# Supplementary material for: Assembly and comparative analysis of the first complete mitochondrial genome of zicaitai (Brassica rapa var. Purpuraria): insights into its genetic architecture and evolutionary relationships
Source: Front Plant Sci. 2024 Oct 10;15:1475064. doi: 10.3389/fpls.2024.1475064 (PMC11499134; doi:10.3389/fpls.2024.1475064)
Supplement: Supplementary file 2 [file Table1.xlsx]

## Sheet: Table S1
Table S1 Codon Usage Preference in the zicaitai mitogenome.
Amino Acid	Symbol	Codon	No.	RSCU
*	Ter	UAA	16	1.4545
*	Ter	UAG	7	0.6364
*	Ter	UGA	10	0.9091
A	Ala	GCA	154	0.9595
A	Ala	GCC	149	0.9283
A	Ala	GCG	77	0.4798
A	Ala	GCU	262	1.6324
C	Cys	UGC	53	0.7737
C	Cys	UGU	84	1.2263
D	Asp	GAC	98	0.6384
D	Asp	GAU	209	1.3616
E	Glu	GAA	262	1.3436
E	Glu	GAG	128	0.6564
F	Phe	UUC	282	0.852
F	Phe	UUU	380	1.148
G	Gly	GGA	246	1.4513
G	Gly	GGC	87	0.5133
G	Gly	GGG	121	0.7139
G	Gly	GGU	224	1.3215
H	His	CAC	50	0.4219
H	His	CAU	187	1.5781
I	Ile	AUA	207	0.8381
I	Ile	AUC	206	0.834
I	Ile	AUU	328	1.3279
K	Lys	AAA	253	1.1962
K	Lys	AAG	170	0.8038
L	Leu	CUA	157	0.8946
L	Leu	CUC	110	0.6268
L	Leu	CUG	101	0.5755
L	Leu	CUU	218	1.2422
L	Leu	UUA	265	1.51
L	Leu	UUG	202	1.151
M	Met	AUG	270	3
M	Met	CUG	0	0
M	Met	UUG	0	0
N	Asn	AAC	93	0.6059
N	Asn	AAU	214	1.3941
P	Pro	CCA	145	1.109
P	Pro	CCC	96	0.7342
P	Pro	CCG	83	0.6348
P	Pro	CCU	199	1.522
Q	Gln	CAA	216	1.554
Q	Gln	CAG	62	0.446
R	Arg	AGA	157	1.5072
R	Arg	AGG	85	0.816
R	Arg	CGA	137	1.3152
R	Arg	CGC	54	0.5184
R	Arg	CGG	65	0.624
R	Arg	CGU	127	1.2192
S	Ser	AGC	102	0.715
S	Ser	AGU	157	1.1005
S	Ser	UCA	147	1.0304
S	Ser	UCC	138	0.9673
S	Ser	UCG	117	0.8201
S	Ser	UCU	195	1.3668
T	Thr	ACA	110	0.9148
T	Thr	ACC	123	1.0229
T	Thr	ACG	73	0.6071
T	Thr	ACU	175	1.4553
V	Val	GUA	186	1.2441
V	Val	GUC	113	0.7559
V	Val	GUG	127	0.8495
V	Val	GUU	172	1.1505
W	Trp	UGG	147	1
Y	Tyr	UAC	73	0.4916
Y	Tyr	UAU	224	1.5084
		Total	9652
