# Supplementary material for: Assembly and comparative analysis of the first complete mitochondrial genome of zicaitai (Brassica rapa var. Purpuraria): insights into its genetic architecture and evolutionary relationships
Source: Front Plant Sci. 2024 Oct 10;15:1475064. doi: 10.3389/fpls.2024.1475064 (PMC11499134; doi:10.3389/fpls.2024.1475064)
Supplement: Supplementary file 3 [file Table2.xlsx]

## Sheet: Table S2
Table S2 The Ka to Ks ratios of 30 protein-coding genes for zicaitai vs. other Brassica mitogenomes.
Gene	B. rapa subsp. nipposinica	B. rapa subsp. oleifera	B. juncea	B. napus	B. oleracea	B. carinata	B. nigra
atp1	0	0	0	0	0	0	0
atp4	0	0	0	0	0	0	0
atp6	0	0	0.899151	0	0	0	0
atp8	0	0	0	0	0	0	0
atp9	0	0	0	0	0	0	0
ccmB	0	0	0	0	0	0	0
ccmC	0	0	0.625142	0	0	0	0
ccmFc	0	0	0.778123	0	0	0.120243	0
cob	0	0	0	0	0	0	0
cox1	0	0	0.124254	0.315488	0	0	0
cox2	0	0	0.685514	0	0	0	0
cox3	0	0	0	0	0	0	0
matR	0	0	0	0	0	0	0
nad1	0	0	0	0	0	0	0.829024
nad2	0	0	0	0	0	0	0.927349
nad3	0	0	0	0	0	0.228879	0.228879
nad4	0	0	0	0	0	0	0
nad4L	0	0	0	0	0	0	0
nad5	0	0	0	0	0	0	0.188738
nad6	0	0	0	0	0	0	0
nad7	0	0	0	0	0	0	0.35917
nad9	0	0	0	0	0	0	0
rpl16	0	0	0	0	0	0	0
rpl2	0	0	0.520577	0	0	0	1.83784
rpl5	0	0	0	0	0	0	0
rps12	0	0	0.508762	0	0	0.211676	0.211676
rps14	0	0	0	0	0	0	0
rps3	0	0	0	0	0	0	0.334141
rps4	0	0	0.308518	0	0	0	0
rps7	0	0	0	0	0	0	0
