# Supplementary material for: Assembly and comparative analysis of the first complete mitochondrial genome of zicaitai (Brassica rapa var. Purpuraria): insights into its genetic architecture and evolutionary relationships
Source: Front Plant Sci. 2024 Oct 10;15:1475064. doi: 10.3389/fpls.2024.1475064 (PMC11499134; doi:10.3389/fpls.2024.1475064)
Supplement: Supplementary file 4 [file Table3.xlsx]

## Sheet: Table S3
Table S3 Large DNA repeats in the zicaitai mitogenome.
#Chr1	Chr2	type	alignment length	similarity	start1	end1	start2	end2	evalue
chr1	chr1	F	2427	100	82648	85074	1	2427	0
chr1	chr1	P	308	99.675	175354	175661	95988	96295	6.28e-160
chr1	chr1	F	312	99.038	199777	200087	112557	112868	2.92e-158
chr1	chr1	F	268	96.269	140845	141112	58915	59182	1.1e-122
chr1	chr1	P	232	99.569	185868	186099	119235	119466	1.11e-117
chr1	chr1	P	284	91.197	112770	113050	27732	28009	8.78e-104
chr1	chr1	P	152	98.684	120811	120961	37176	37327	5.52e-71
chr1	chr1	P	147	99.32	214699	214845	203235	203380	7.13e-70
chr1	chr1	F	140	98.571	60814	60953	28035	28174	7.19e-65
chr1	chr1	F	132	100	110640	110771	25879	26010	9.29e-64
chr1	chr1	P	254	85.433	169943	170195	26849	27077	1.2e-62
chr1	chr1	F	168	92.857	165796	165961	25907	26071	4.32e-62
chr1	chr1	P	99	95.96	199989	200087	27911	28009	9.63e-39
chr1	chr1	P	110	91.818	85174	85283	42371	42480	1.61e-36
chr1	chr1	F	106	91.509	209751	209856	119418	119523	2.7e-34
chr1	chr1	P	78	100	163895	163972	51695	51772	9.7e-34
chr1	chr1	P	78	100	165953	166030	126076	126153	9.7e-34
chr1	chr1	P	154	84.416	138309	138447	6663	6816	1.62e-31
chr1	chr1	F	79	97.468	199675	199753	103556	103634	5.84e-31
chr1	chr1	F	76	98.684	119196	119271	119157	119232	5.84e-31
chr1	chr1	P	81	96.296	211316	211396	27081	27161	2.1e-30
chr1	chr1	F	91	93.407	167964	168054	36901	36990	2.1e-30
chr1	chr1	P	79	97.468	219090	219168	114515	114592	2.1e-30
chr1	chr1	F	107	88.785	165796	165900	110668	110771	3.51e-28
chr1	chr1	P	62	100	186063	186124	119132	119193	7.6e-25
chr1	chr1	P	71	94.366	69038	69108	28198	28265	4.58e-22
chr1	chr1	F	65	95.385	175661	175725	51620	51684	1.65e-21
chr1	chr1	F	62	96.774	200605	200666	74080	74141	1.65e-21
chr1	chr1	P	73	93.151	215744	215811	16921	16993	5.92e-21
chr1	chr1	F	56	98.214	147782	147837	13707	13762	7.66e-20
chr1	chr1	P	59	96.61	149303	149361	41312	41370	7.66e-20
chr1	chr1	P	65	93.846	41312	41376	149297	149361	7.66e-20
chr1	chr1	P	59	96.61	77299	77357	12120	12177	2.75e-19
chr1	chr1	P	117	82.906	218627	218741	43632	43740	2.75e-19
chr1	chr1	P	54	98.148	199363	199416	187469	187522	9.91e-19
chr1	chr1	P	57	96.491	187469	187525	199360	199416	9.91e-19
chr1	chr1	P	53	98.113	51723	51775	29074	29126	3.56e-18
chr1	chr1	F	50	100	163895	163944	29077	29126	3.56e-18
chr1	chr1	P	50	100	29077	29126	51723	51772	3.56e-18
chr1	chr1	P	49	100	101870	101918	10307	10355	1.28e-17
chr1	chr1	P	59	94.915	79058	79116	28186	28243	1.28e-17
chr1	chr1	P	65	92.308	28186	28249	79052	79116	1.28e-17
chr1	chr1	P	58	94.828	60935	60991	23558	23614	4.61e-17
chr1	chr1	F	51	98.039	145783	145833	119675	119725	4.61e-17
chr1	chr1	P	150	78	218625	218770	131862	132010	4.61e-17
chr1	chr1	F	79	87.342	71659	71737	33570	33645	1.66e-16
chr1	chr1	P	52	96.154	4083	4134	1884	1935	5.96e-16
chr1	chr1	P	58	93.103	84531	84588	4077	4134	5.96e-16
chr1	chr1	P	58	93.103	1884	1941	4077	4134	5.96e-16
chr1	chr1	P	52	96.154	65598	65649	21799	21850	5.96e-16
chr1	chr1	P	46	100	199115	199160	74449	74494	5.96e-16
chr1	chr1	P	52	96.154	4083	4134	84531	84582	5.96e-16
chr1	chr1	P	85	84.706	141120	141204	112029	112111	2.14e-15
chr1	chr1	P	82	85.366	112032	112111	141120	141201	2.14e-15
chr1	chr1	F	45	100	166891	166935	160018	160062	2.14e-15
chr1	chr1	F	48	97.917	71659	71706	65572	65618	7.71e-15
chr1	chr1	P	71	87.324	69038	69108	60919	60987	2.77e-14
chr1	chr1	F	65	89.231	79060	79124	69065	69127	2.77e-14
chr1	chr1	P	49	95.918	209751	209799	185868	185916	2.77e-14
chr1	chr1	P	45	97.778	51354	51398	4046	4090	9.98e-14
chr1	chr1	F	52	94.231	71572	71622	71536	71587	9.98e-14
chr1	chr1	F	72	87.5	185673	185739	141110	141181	9.98e-14
chr1	chr1	F	51	94.118	65567	65616	33565	33614	3.59e-13
chr1	chr1	P	41	100	170365	170405	154876	154916	3.59e-13
chr1	chr1	P	41	100	212105	212145	170364	170404	3.59e-13
chr1	chr1	F	45	97.778	215041	215084	209255	209299	3.59e-13
chr1	chr1	F	40	100	44659	44698	16929	16968	1.29e-12
chr1	chr1	F	50	94	60904	60953	28156	28203	1.29e-12
chr1	chr1	P	40	100	215764	215803	44659	44698	1.29e-12
chr1	chr1	F	50	94	49128	49176	49100	49149	1.29e-12
chr1	chr1	F	40	100	212105	212144	154877	154916	1.29e-12
chr1	chr1	F	39	100	159780	159818	29079	29117	4.64e-12
chr1	chr1	P	39	100	212109	212147	51692	51730	4.64e-12
chr1	chr1	P	42	97.619	159780	159821	51729	51770	4.64e-12
chr1	chr1	P	86	82.558	113774	113858	57124	57206	4.64e-12
chr1	chr1	F	42	97.619	212105	212146	101453	101494	4.64e-12
chr1	chr1	F	46	95.652	163890	163935	159774	159818	4.64e-12
chr1	chr1	P	42	97.619	51732	51773	159777	159818	4.64e-12
chr1	chr1	P	42	97.619	60919	60959	305	346	1.67e-11
chr1	chr1	P	67	86.567	74079	74142	22209	22275	1.67e-11
chr1	chr1	P	45	95.556	154877	154920	29882	29926	1.67e-11
chr1	chr1	P	41	97.561	212105	212145	29886	29926	1.67e-11
chr1	chr1	F	41	97.561	170364	170404	29886	29926	1.67e-11
chr1	chr1	P	47	93.617	85093	85139	42444	42490	1.67e-11
chr1	chr1	F	78	83.333	131892	131968	43632	43708	1.67e-11
chr1	chr1	P	42	97.619	82952	82993	60919	60959	1.67e-11
chr1	chr1	P	67	86.567	187539	187602	60922	60987	1.67e-11
chr1	chr1	P	38	100	42453	42490	85093	85130	1.67e-11
chr1	chr1	F	41	97.561	164668	164708	100376	100416	1.67e-11
chr1	chr1	P	41	97.561	170364	170404	101453	101493	1.67e-11
chr1	chr1	P	66	87.879	163639	163696	103107	103172	1.67e-11
chr1	chr1	P	56	89.286	205099	205154	179324	179379	1.67e-11
chr1	chr1	P	53	90.566	179327	179379	205099	205151	1.67e-11
chr1	chr1	P	40	97.5	79077	79116	28157	28196	6e-11
chr1	chr1	F	53	90.566	88107	88157	29079	29131	6e-11
chr1	chr1	P	43	95.349	154881	154923	51688	51730	6e-11
chr1	chr1	F	37	100	170364	170400	51694	51730	6e-11
chr1	chr1	P	68	85.294	165547	165614	77303	77369	6e-11
chr1	chr1	F	47	93.617	154871	154916	101446	101492	6e-11
chr1	chr1	P	40	97.5	51691	51730	154881	154920	6e-11
chr1	chr1	F	37	100	163937	163973	154881	154917	6e-11
chr1	chr1	F	47	93.617	170365	170410	160371	160416	6e-11
chr1	chr1	P	43	95.349	28260	28300	304	346	2.16e-10
chr1	chr1	P	43	95.349	82951	82993	28260	28300	2.16e-10
chr1	chr1	P	36	100	121085	121120	48875	48910	2.16e-10
chr1	chr1	P	39	97.436	48875	48913	121082	121120	2.16e-10
chr1	chr1	F	36	100	160312	160347	159075	159110	2.16e-10
chr1	chr1	P	47	93.617	212101	212144	160371	160417	2.16e-10
chr1	chr1	P	36	100	170365	170400	163937	163972	2.16e-10
chr1	chr1	F	36	100	212109	212144	163937	163972	2.16e-10
chr1	chr1	P	35	100	28169	28203	312	346	7.77e-10
chr1	chr1	P	35	100	28140	28174	312	346	7.77e-10
chr1	chr1	P	35	100	65598	65632	6201	6235	7.77e-10
chr1	chr1	F	35	100	28260	28294	28140	28174	7.77e-10
chr1	chr1	P	35	100	82959	82993	28140	28174	7.77e-10
chr1	chr1	F	35	100	28260	28294	28169	28203	7.77e-10
chr1	chr1	P	35	100	82959	82993	28169	28203	7.77e-10
chr1	chr1	F	93	80.645	60904	60994	28185	28272	7.77e-10
chr1	chr1	F	35	100	60919	60953	28260	28294	7.77e-10
chr1	chr1	P	41	95.122	101453	101493	29886	29926	7.77e-10
chr1	chr1	P	38	97.368	101457	101494	51693	51730	7.77e-10
chr1	chr1	P	35	100	88118	88152	51723	51757	7.77e-10
chr1	chr1	P	42	95.238	6201	6240	65591	65632	7.77e-10
chr1	chr1	F	35	100	95344	95378	77373	77407	7.77e-10
chr1	chr1	F	48	91.667	163897	163944	88107	88152	7.77e-10
chr1	chr1	P	48	91.667	51723	51770	88107	88152	7.77e-10
chr1	chr1	P	42	95.238	160371	160412	154877	154916	7.77e-10
chr1	chr1	F	35	100	187380	187414	186340	186374	7.77e-10
chr1	chr1	F	53	88.679	175880	175931	2262	2314	2.79e-09
chr1	chr1	F	41	95.122	51691	51730	29882	29922	2.79e-09
chr1	chr1	F	34	100	206052	206085	37437	37470	2.79e-09
chr1	chr1	F	34	100	160371	160404	51695	51728	2.79e-09
chr1	chr1	F	44	93.182	79045	79087	68977	69019	2.79e-09
chr1	chr1	F	53	88.679	175880	175931	84909	84961	2.79e-09
chr1	chr1	F	37	97.297	85174	85210	85103	85139	2.79e-09
chr1	chr1	F	37	97.297	119235	119271	119157	119193	2.79e-09
chr1	chr1	P	37	97.297	186063	186099	119196	119232	2.79e-09
chr1	chr1	P	44	93.182	163939	163980	160361	160404	2.79e-09
chr1	chr1	P	34	100	160371	160404	163939	163972	2.79e-09
chr1	chr1	F	77	81.818	170758	170833	167673	167749	2.79e-09
chr1	chr1	P	33	100	195546	195578	6205	6237	1e-08
chr1	chr1	F	37	97.297	187861	187896	6924	6960	1e-08
chr1	chr1	F	106	78.302	28185	28287	28125	28225	1e-08
chr1	chr1	F	43	93.023	160371	160413	29887	29927	1e-08
chr1	chr1	P	36	97.222	163937	163972	29887	29922	1e-08
chr1	chr1	F	36	97.222	163937	163972	101457	101492	1e-08
chr1	chr1	F	36	97.222	211711	211746	137712	137747	1e-08
chr1	chr1	P	39	94.872	54373	54411	310	347	3.61e-08
chr1	chr1	F	35	97.143	21816	21850	6201	6235	3.61e-08
chr1	chr1	F	32	100	111203	111234	16743	16774	3.61e-08
chr1	chr1	P	38	94.737	199350	199387	23581	23618	3.61e-08
chr1	chr1	P	41	92.683	43399	43439	28166	28206	3.61e-08
chr1	chr1	P	39	94.872	187565	187602	28172	28209	3.61e-08
chr1	chr1	F	114	76.316	104758	104870	37393	37506	3.61e-08
chr1	chr1	P	32	100	69079	69110	54372	54403	3.61e-08
chr1	chr1	P	39	94.872	82957	82994	54373	54411	3.61e-08
chr1	chr1	F	77	81.818	187530	187602	69030	69105	3.61e-08
chr1	chr1	F	35	97.143	217764	217798	78815	78849	3.61e-08
chr1	chr1	F	32	100	209581	209612	100330	100361	3.61e-08
chr1	chr1	P	42	92.857	160371	160412	101453	101492	3.61e-08
chr1	chr1	F	32	100	147705	147736	106405	106436	3.61e-08
chr1	chr1	F	39	94.872	202114	202152	191675	191712	3.61e-08
chr1	chr1	P	38	94.737	23584	23621	199347	199384	3.61e-08
chr1	chr1	F	41	92.683	209457	209497	209343	209383	3.61e-08
chr1	chr1	F	40	92.5	219740	219779	1766	1805	1.3e-07
chr1	chr1	P	31	100	29638	29668	23595	23625	1.3e-07
chr1	chr1	P	31	100	79077	79107	28137	28167	1.3e-07
chr1	chr1	F	34	97.059	196517	196550	28139	28172	1.3e-07
chr1	chr1	F	34	97.059	196517	196550	28168	28201	1.3e-07
chr1	chr1	P	34	97.059	80991	81024	40636	40669	1.3e-07
chr1	chr1	F	38	94.737	60919	60955	54374	54411	1.3e-07
chr1	chr1	P	31	100	79077	79107	60916	60946	1.3e-07
chr1	chr1	F	34	97.059	196517	196550	60918	60951	1.3e-07
chr1	chr1	P	57	85.965	132473	132526	64244	64300	1.3e-07
chr1	chr1	F	31	100	195548	195578	65598	65628	1.3e-07
chr1	chr1	P	31	100	40639	40669	80991	81021	1.3e-07
chr1	chr1	F	40	92.5	219740	219779	84413	84452	1.3e-07
chr1	chr1	P	31	100	186075	186105	111921	111951	1.3e-07
chr1	chr1	F	31	100	119151	119181	111921	111951	1.3e-07
chr1	chr1	F	38	94.737	195543	195580	147643	147679	1.3e-07
chr1	chr1	F	33	96.97	23229	23261	312	344	4.67e-07
chr1	chr1	P	33	96.97	196518	196550	314	346	4.67e-07
chr1	chr1	P	81	80.247	167816	167890	2319	2399	4.67e-07
chr1	chr1	F	36	94.444	165579	165614	12139	12174	4.67e-07
chr1	chr1	P	65	83.077	200605	200666	22210	22274	4.67e-07
chr1	chr1	F	33	96.97	82959	82991	23229	23261	4.67e-07
chr1	chr1	P	33	96.97	60921	60953	23229	23261	4.67e-07
chr1	chr1	P	33	96.97	28262	28294	23229	23261	4.67e-07
chr1	chr1	P	33	96.97	28171	28203	23229	23261	4.67e-07
chr1	chr1	P	33	96.97	28142	28174	23229	23261	4.67e-07
chr1	chr1	P	39	92.308	43401	43439	28137	28175	4.67e-07
chr1	chr1	P	34	97.059	187569	187602	28143	28175	4.67e-07
chr1	chr1	F	33	96.97	196518	196550	28260	28292	4.67e-07
chr1	chr1	P	30	100	39446	39475	36215	36244	4.67e-07
chr1	chr1	P	30	100	79075	79104	54374	54403	4.67e-07
chr1	chr1	P	33	96.97	187570	187602	54377	54409	4.67e-07
chr1	chr1	P	33	96.97	196518	196550	82961	82993	4.67e-07
chr1	chr1	P	81	80.247	167816	167890	84966	85046	4.67e-07
chr1	chr1	P	51	86.275	167805	167855	120214	120264	4.67e-07
chr1	chr1	P	34	97.059	187847	187879	147809	147842	4.67e-07
chr1	chr1	P	75	81.333	84975	85049	167813	167881	4.67e-07
chr1	chr1	P	75	81.333	2328	2402	167813	167881	4.67e-07
chr1	chr1	F	74	81.081	209113	209184	205981	206052	4.67e-07
chr1	chr1	F	33	96.97	187570	187602	312	343	1.68e-06
chr1	chr1	F	29	100	69081	69109	319	347	1.68e-06
chr1	chr1	F	35	94.286	151554	151588	975	1009	1.68e-06
chr1	chr1	F	58	84.483	42092	42146	2161	2217	1.68e-06
chr1	chr1	P	32	96.875	147646	147677	6205	6236	1.68e-06
chr1	chr1	P	29	100	187851	187879	13734	13762	1.68e-06
chr1	chr1	F	29	100	129062	129090	15100	15128	1.68e-06
chr1	chr1	P	32	96.875	50605	50636	23595	23626	1.68e-06
chr1	chr1	F	36	94.444	54374	54409	28140	28174	1.68e-06
chr1	chr1	F	36	94.444	54374	54409	28169	28203	1.68e-06
chr1	chr1	F	36	94.444	54374	54409	28260	28294	1.68e-06
chr1	chr1	P	33	96.97	187570	187602	28263	28294	1.68e-06
chr1	chr1	F	32	96.875	50606	50637	29638	29669	1.68e-06
chr1	chr1	F	29	100	176345	176373	35924	35952	1.68e-06
chr1	chr1	F	58	84.483	84808	84864	42092	42146	1.68e-06
chr1	chr1	P	38	92.105	60916	60953	43402	43439	1.68e-06
chr1	chr1	F	36	94.444	196511	196545	54366	54401	1.68e-06
chr1	chr1	F	29	100	82966	82994	69081	69109	1.68e-06
chr1	chr1	P	29	100	91923	91951	69646	69674	1.68e-06
chr1	chr1	F	57	84.211	147701	147756	71681	71737	1.68e-06
chr1	chr1	F	50	86	200895	200944	75145	75194	1.68e-06
chr1	chr1	P	29	100	196517	196545	79077	79105	1.68e-06
chr1	chr1	F	33	96.97	187570	187602	82959	82990	1.68e-06
chr1	chr1	F	35	94.286	151554	151588	83622	83656	1.68e-06
chr1	chr1	P	41	90.244	194376	194416	104375	104415	1.68e-06
chr1	chr1	F	29	100	159108	159136	115963	115991	1.68e-06
chr1	chr1	P	38	92.105	6205	6242	147640	147677	1.68e-06
chr1	chr1	P	57	84.211	199388	199444	156620	156675	1.68e-06
chr1	chr1	P	48	87.5	196160	196205	157868	157915	1.68e-06
chr1	chr1	P	38	92.105	104378	104415	194376	194413	1.68e-06
chr1	chr1	F	28	100	79077	79104	319	346	6.05e-06
chr1	chr1	P	31	96.774	195548	195578	21820	21850	6.05e-06
chr1	chr1	P	37	91.892	196520	196556	23225	23261	6.05e-06
chr1	chr1	P	41	90.244	28241	28279	23546	23586	6.05e-06
chr1	chr1	P	34	94.118	24051	24084	24051	24084	6.05e-06
chr1	chr1	P	31	96.774	95326	95356	25344	25374	6.05e-06
chr1	chr1	P	28	100	69081	69108	28140	28167	6.05e-06
chr1	chr1	P	28	100	69081	69108	28169	28196	6.05e-06
chr1	chr1	P	28	100	79077	79104	28260	28287	6.05e-06
chr1	chr1	P	28	100	69081	69108	28260	28287	6.05e-06
chr1	chr1	F	31	96.774	147647	147677	65598	65628	6.05e-06
chr1	chr1	P	28	100	196518	196545	69081	69108	6.05e-06
chr1	chr1	F	31	96.774	102414	102444	74597	74627	6.05e-06
chr1	chr1	F	28	100	187575	187602	79074	79101	6.05e-06
chr1	chr1	F	28	100	82966	82993	79077	79104	6.05e-06
chr1	chr1	P	34	94.118	177625	177658	87669	87702	6.05e-06
chr1	chr1	P	48	87.5	195908	195953	156624	156669	6.05e-06
chr1	chr1	P	31	96.774	180084	180114	167966	167996	6.05e-06
chr1	chr1	P	34	94.118	87672	87705	177622	177655	6.05e-06
