# Supplementary material for: Assembly and comparative analysis of the first complete mitochondrial genome of zicaitai (Brassica rapa var. Purpuraria): insights into its genetic architecture and evolutionary relationships
Source: Front Plant Sci. 2024 Oct 10;15:1475064. doi: 10.3389/fpls.2024.1475064 (PMC11499134; doi:10.3389/fpls.2024.1475064)
Supplement: Supplementary file 5 [file Table4.xlsx]

## Sheet: Table S4
Table S4 Information of RNA editing in the zicaitai mitogenome.
ID	Gene	Nt Pos	AA Pos	Align Col	Effect	Score
Brassica rapa var. purpuraria	atp1	665	222	224	ACT (T) => ATT (I)	0.7
Brassica rapa var. purpuraria	atp1	1178	393	395	TCA (S) => TTA (L)	0.9
Brassica rapa var. purpuraria	atp1	1292	431	433	CCG (P) => CTG (L)	0.8
Brassica rapa var. purpuraria	atp1	1415	472	474	CCA (P) => CTA (L)	1
Brassica rapa var. purpuraria	atp1	1484	495	499	CCA (P) => CTA (L)	0.9
Brassica rapa var. purpuraria	atp4	59	20	24	TCT (S) => TTT (F)	0.57
Brassica rapa var. purpuraria	atp4	89	30	34	TCA (S) => TTA (L)	1
Brassica rapa var. purpuraria	atp4	215	72	76	TCG (S) => TTG (L)	1
Brassica rapa var. purpuraria	atp4	226	76	80	CCC (P) => TTC (F)	0.57
Brassica rapa var. purpuraria	atp4	227	76	80	CCC (P) => TTC (F)	0.57
Brassica rapa var. purpuraria	atp4	248	83	87	CCT (P) => CTT (L)	1
Brassica rapa var. purpuraria	atp4	395	132	140	TCA (S) => TTA (L)	1
Brassica rapa var. purpuraria	atp4	416	139	147	ACT (T) => ATT (I)	0.86
Brassica rapa var. purpuraria	atp4	488	163	171	GCC (A) => GTC (V)	0.71
Brassica rapa var. purpuraria	atp6	103	35	36	CCA (P) => TCA (S)	0.75
Brassica rapa var. purpuraria	atp9	20	7	7	TCA (S) => TTA (L)	1
Brassica rapa var. purpuraria	atp9	50	17	17	TCA (S) => TTA (L)	1
Brassica rapa var. purpuraria	atp9	134	45	45	TCA (S) => TTA (L)	1
Brassica rapa var. purpuraria	atp9	191	64	64	CCA (P) => CTA (L)	1
Brassica rapa var. purpuraria	ccmB	28	10	10	CAT (H) => TAT (Y)	0.89
Brassica rapa var. purpuraria	ccmB	43	15	17	CCC (P) => TCC (S)	0.67
Brassica rapa var. purpuraria	ccmB	71	24	26	CCA (P) => CTA (L)	1
Brassica rapa var. purpuraria	ccmB	80	27	29	TCG (S) => TTG (L)	1
Brassica rapa var. purpuraria	ccmB	128	43	45	TCA (S) => TTA (L)	1
Brassica rapa var. purpuraria	ccmB	137	46	48	TCC (S) => TTC (F)	1
Brassica rapa var. purpuraria	ccmB	149	50	52	CCG (P) => CTG (L)	1
Brassica rapa var. purpuraria	ccmB	154	52	54	CGG (R) => TGG (W)	1
Brassica rapa var. purpuraria	ccmB	160	54	56	CCT (P) => TCT (S)	0.67
Brassica rapa var. purpuraria	ccmB	164	55	57	CCG (P) => CTG (L)	0.89
Brassica rapa var. purpuraria	ccmB	172	58	60	CCT (P) => TCT (S)	0.89
Brassica rapa var. purpuraria	ccmB	179	60	62	CCT (P) => CTT (L)	1
Brassica rapa var. purpuraria	ccmB	181	61	63	CCC (P) => TCC (S)	0.78
Brassica rapa var. purpuraria	ccmB	193	65	69	CCT (P) => TTT (F)	0.89
Brassica rapa var. purpuraria	ccmB	194	65	69	CCT (P) => TTT (F)	0.89
Brassica rapa var. purpuraria	ccmB	286	96	102	CGG (R) => TGG (W)	1
Brassica rapa var. purpuraria	ccmB	304	102	108	CGT (R) => TGT (C)	0.78
Brassica rapa var. purpuraria	ccmB	338	113	119	TCG (S) => TTG (L)	1
Brassica rapa var. purpuraria	ccmB	367	123	129	CGG (R) => TGG (W)	0.78
Brassica rapa var. purpuraria	ccmB	380	127	133	CCA (P) => CTA (L)	0.78
Brassica rapa var. purpuraria	ccmB	424	142	148	CGT (R) => TGT (C)	0.89
Brassica rapa var. purpuraria	ccmB	428	143	149	TCG (S) => TTG (L)	1
Brassica rapa var. purpuraria	ccmB	467	156	163	TCG (S) => TTG (L)	0.89
Brassica rapa var. purpuraria	ccmB	476	159	166	CCA (P) => CTA (L)	0.89
Brassica rapa var. purpuraria	ccmB	485	162	169	TCA (S) => TTA (L)	1
Brassica rapa var. purpuraria	ccmB	512	171	178	TCT (S) => TTT (F)	1
Brassica rapa var. purpuraria	ccmB	514	172	179	CGT (R) => TGT (C)	1
Brassica rapa var. purpuraria	ccmB	551	184	191	TCA (S) => TTA (L)	1
Brassica rapa var. purpuraria	ccmB	554	185	192	TCG (S) => TTG (L)	0.89
Brassica rapa var. purpuraria	ccmB	566	189	196	TCC (S) => TTC (F)	0.78
Brassica rapa var. purpuraria	ccmB	569	190	197	TCT (S) => TTT (F)	0.78
Brassica rapa var. purpuraria	ccmB	596	199	206	TCG (S) => TTG (L)	0.89
Brassica rapa var. purpuraria	ccmC	10	4	10	CCG (P) => TCG (S)	0.56
Brassica rapa var. purpuraria	ccmC	103	35	41	CAT (H) => TAT (Y)	1
Brassica rapa var. purpuraria	ccmC	133	45	51	CTT (L) => TTT (F)	0.67
Brassica rapa var. purpuraria	ccmC	179	60	66	GCG (A) => GTG (V)	0.78
Brassica rapa var. purpuraria	ccmC	184	62	68	CGG (R) => TGG (W)	1
Brassica rapa var. purpuraria	ccmC	331	111	117	CGG (R) => TGG (W)	1
Brassica rapa var. purpuraria	ccmC	395	132	138	TCG (S) => TTG (L)	1
Brassica rapa var. purpuraria	ccmC	400	134	140	CTT (L) => TTT (F)	0.89
Brassica rapa var. purpuraria	ccmC	421	141	147	CGT (R) => TGT (C)	0.78
Brassica rapa var. purpuraria	ccmC	436	146	152	CCT (P) => TCT (S)	0.89
Brassica rapa var. purpuraria	ccmC	446	149	155	CCG (P) => CTG (L)	0.78
Brassica rapa var. purpuraria	ccmC	458	153	159	TCA (S) => TTA (L)	0.78
Brassica rapa var. purpuraria	ccmC	463	155	161	CGT (R) => TGT (C)	1
Brassica rapa var. purpuraria	ccmC	467	156	162	GCT (A) => GTT (V)	0.78
Brassica rapa var. purpuraria	ccmC	473	158	164	CCG (P) => CTG (L)	1
Brassica rapa var. purpuraria	ccmC	497	166	172	TCT (S) => TTT (F)	1
Brassica rapa var. purpuraria	ccmC	521	174	180	TCG (S) => TTG (L)	1
Brassica rapa var. purpuraria	ccmC	548	183	189	TCT (S) => TTT (F)	1
Brassica rapa var. purpuraria	ccmC	568	190	196	CCT (P) => TCT (S)	1
Brassica rapa var. purpuraria	ccmC	575	192	198	CCC (P) => CTC (L)	1
Brassica rapa var. purpuraria	ccmC	608	203	209	CCC (P) => CTC (L)	0.89
Brassica rapa var. purpuraria	ccmC	614	205	211	TCA (S) => TTA (L)	0.78
Brassica rapa var. purpuraria	ccmC	619	207	213	CGT (R) => TGT (C)	0.78
Brassica rapa var. purpuraria	ccmC	650	217	223	CCT (P) => CTT (L)	0.78
Brassica rapa var. purpuraria	ccmC	656	219	225	CCA (P) => CTA (L)	0.89
Brassica rapa var. purpuraria	ccmC	673	225	231	CCT (P) => TCT (S)	0.78
Brassica rapa var. purpuraria	ccmFc	50	17	17	CCT (P) => CTT (L)	1
Brassica rapa var. purpuraria	ccmFc	103	35	35	CCC (P) => TCC (S)	1
Brassica rapa var. purpuraria	ccmFc	122	41	41	TCC (S) => TTC (F)	1
Brassica rapa var. purpuraria	ccmFc	146	49	49	CCT (P) => CTT (L)	1
Brassica rapa var. purpuraria	ccmFc	155	52	52	TCA (S) => TTA (L)	1
Brassica rapa var. purpuraria	ccmFc	160	54	54	CCT (P) => TCT (S)	0.67
Brassica rapa var. purpuraria	ccmFc	406	136	136	CGT (R) => TGT (C)	0.83
Brassica rapa var. purpuraria	ccmFc	415	139	139	CTC (L) => TTC (F)	1
Brassica rapa var. purpuraria	ccmFc	890	297	297	TCT (S) => TTT (F)	0.83
Brassica rapa var. purpuraria	ccmFc	1172	391	394	TCG (S) => TTG (L)	1
Brassica rapa var. purpuraria	ccmFc	1246	416	419	CGG (R) => TGG (W)	1
Brassica rapa var. purpuraria	ccmFc	1327	443	446	CGA (R) => TGA (X)	1
Brassica rapa var. purpuraria	ccmFn	38	13	15	CCG (P) => CTG (L)	1
Brassica rapa var. purpuraria	ccmFn	98	33	35	CCT (P) => CTT (L)	1
Brassica rapa var. purpuraria	ccmFn	137	46	48	TCG (S) => TTG (L)	1
Brassica rapa var. purpuraria	ccmFn	151	51	53	CCT (P) => TCT (S)	0.83
Brassica rapa var. purpuraria	ccmFn	256	86	88	CGG (R) => TGG (W)	1
Brassica rapa var. purpuraria	ccmFn	263	88	90	CCA (P) => CTA (L)	0.83
Brassica rapa var. purpuraria	ccmFn	283	95	97	CTT (L) => TTT (F)	0.83
Brassica rapa var. purpuraria	ccmFn	334	112	114	CAT (H) => TAT (Y)	0.67
Brassica rapa var. purpuraria	ccmFn	365	122	124	TCG (S) => TTG (L)	0.67
Brassica rapa var. purpuraria	ccmFn	478	160	164	CGT (R) => TGT (C)	0.83
Brassica rapa var. purpuraria	ccmFn	559	187	191	CCT (P) => TTT (F)	0.5
Brassica rapa var. purpuraria	ccmFn	560	187	191	CCT (P) => TTT (F)	0.5
Brassica rapa var. purpuraria	ccmFn	706	236	240	CCT (P) => TTT (F)	0.67
Brassica rapa var. purpuraria	ccmFn	707	236	240	CCT (P) => TTT (F)	0.67
Brassica rapa var. purpuraria	ccmFn	716	239	243	TCA (S) => TTA (L)	0.83
Brassica rapa var. purpuraria	ccmFn	776	259	263	TCA (S) => TTA (L)	1
Brassica rapa var. purpuraria	ccmFn	788	263	267	CCA (P) => CTA (L)	1
Brassica rapa var. purpuraria	ccmFn	803	268	272	TCA (S) => TTA (L)	1
Brassica rapa var. purpuraria	ccmFn	952	318	322	CGC (R) => TGC (C)	1
Brassica rapa var. purpuraria	cob	118	40	41	CCG (P) => TCG (S)	0.92
Brassica rapa var. purpuraria	cob	286	96	97	CTT (L) => TTT (F)	1
Brassica rapa var. purpuraria	cob	325	109	110	CAT (H) => TAT (Y)	1
Brassica rapa var. purpuraria	cob	568	190	191	CAT (H) => TAT (Y)	0.92
Brassica rapa var. purpuraria	cob	853	285	286	CAT (H) => TAT (Y)	1
Brassica rapa var. purpuraria	cob	908	303	304	CCA (P) => CTA (L)	1
Brassica rapa var. purpuraria	cob	982	328	329	CAC (H) => TAC (Y)	0.85
Brassica rapa var. purpuraria	cob	1084	362	363	CCT (P) => TCT (S)	1
Brassica rapa var. purpuraria	cox2	71	24	26	TCT (S) => TTT (F)	1
Brassica rapa var. purpuraria	cox2	253	85	87	CGG (R) => TGG (W)	1
Brassica rapa var. purpuraria	cox2	278	93	95	TCG (S) => TTG (L)	1
Brassica rapa var. purpuraria	cox2	476	159	161	TCA (S) => TTA (L)	1
Brassica rapa var. purpuraria	cox2	557	186	188	CCT (P) => CTT (L)	1
Brassica rapa var. purpuraria	cox2	581	194	196	TCA (S) => TTA (L)	1
Brassica rapa var. purpuraria	cox2	698	233	235	ACG (T) => ATG (M)	1
Brassica rapa var. purpuraria	cox2	721	241	243	CCT (P) => TCT (S)	0.79
Brassica rapa var. purpuraria	cox2	742	248	250	CGG (R) => TGG (W)	1
Brassica rapa var. purpuraria	cox3	112	38	39	CCA (P) => TCA (S)	1
Brassica rapa var. purpuraria	cox3	245	82	83	CCT (P) => CTT (L)	0.92
Brassica rapa var. purpuraria	cox3	257	86	87	TCT (S) => TTT (F)	0.67
Brassica rapa var. purpuraria	cox3	311	104	105	TCT (S) => TTT (F)	0.92
Brassica rapa var. purpuraria	cox3	314	105	106	TCT (S) => TTT (F)	0.92
Brassica rapa var. purpuraria	cox3	413	138	139	CCT (P) => CTT (L)	0.83
Brassica rapa var. purpuraria	cox3	422	141	142	CCT (P) => CTT (L)	0.92
Brassica rapa var. purpuraria	matR	32	11	31	TCC (S) => TTC (F)	0.62
Brassica rapa var. purpuraria	matR	236	79	99	TCC (S) => TTC (F)	0.62
Brassica rapa var. purpuraria	matR	326	109	129	CCA (P) => CTA (L)	1
Brassica rapa var. purpuraria	matR	457	153	173	CCT (P) => TCT (S)	0.5
Brassica rapa var. purpuraria	matR	1372	458	481	CCT (P) => TCT (S)	0.75
Brassica rapa var. purpuraria	matR	1415	472	495	GCG (A) => GTG (V)	0.62
Brassica rapa var. purpuraria	matR	1460	487	510	GCC (A) => GTC (V)	0.62
Brassica rapa var. purpuraria	matR	1685	562	585	TCC (S) => TTC (F)	1
Brassica rapa var. purpuraria	matR	1706	569	592	CCT (P) => CTT (L)	1
Brassica rapa var. purpuraria	matR	1726	576	599	CGC (R) => TGC (C)	1
Brassica rapa var. purpuraria	matR	1762	588	611	CAC (H) => TAC (Y)	1
Brassica rapa var. purpuraria	matR	1832	611	634	CCC (P) => CTC (L)	0.88
Brassica rapa var. purpuraria	matR	1850	617	640	TCA (S) => TTA (L)	0.88
Brassica rapa var. purpuraria	mttB	31	11	156	CAT (H) => TAT (Y)	0.88
Brassica rapa var. purpuraria	mttB	56	19	164	TCG (S) => TTG (L)	0.88
Brassica rapa var. purpuraria	mttB	64	22	167	CCA (P) => TCA (S)	1
Brassica rapa var. purpuraria	mttB	107	36	181	CCA (P) => CTA (L)	0.62
Brassica rapa var. purpuraria	mttB	113	38	183	CCA (P) => CTA (L)	0.5
Brassica rapa var. purpuraria	mttB	169	57	202	CCG (P) => TCG (S)	1
Brassica rapa var. purpuraria	mttB	226	76	221	CGT (R) => TGT (C)	0.62
Brassica rapa var. purpuraria	mttB	272	91	236	TCG (S) => TTG (L)	0.75
Brassica rapa var. purpuraria	nad1	2	1	1	ACG (T) => ATG (M)	1
Brassica rapa var. purpuraria	nad1	2	1	2	ACG (T) => ATG (M)	1
Brassica rapa var. purpuraria	nad1	2	1	3	ACG (T) => ATG (M)	1
Brassica rapa var. purpuraria	nad1	2	1	4	ACG (T) => ATG (M)	1
Brassica rapa var. purpuraria	nad1	167	56	59	TCG (S) => TTG (L)	1
Brassica rapa var. purpuraria	nad1	265	89	92	CGG (R) => TGG (W)	1
Brassica rapa var. purpuraria	nad1	308	103	106	CCG (P) => CTG (L)	1
Brassica rapa var. purpuraria	nad1	376	126	129	CGG (R) => TGG (W)	1
Brassica rapa var. purpuraria	nad1	490	164	167	CCC (P) => TCC (S)	1
Brassica rapa var. purpuraria	nad1	493	165	168	CGT (R) => TGT (C)	1
Brassica rapa var. purpuraria	nad1	500	167	170	TCG (S) => TTG (L)	0.7
Brassica rapa var. purpuraria	nad1	536	179	182	TCT (S) => TTT (F)	1
Brassica rapa var. purpuraria	nad1	571	191	194	CTT (L) => TTT (F)	1
Brassica rapa var. purpuraria	nad1	580	194	197	CGT (R) => TGT (C)	1
Brassica rapa var. purpuraria	nad1	635	212	215	TCA (S) => TTA (L)	1
Brassica rapa var. purpuraria	nad1	674	225	228	TCT (S) => TTT (F)	0.9
Brassica rapa var. purpuraria	nad1	725	242	245	CCA (P) => CTA (L)	1
Brassica rapa var. purpuraria	nad1	743	248	251	CCA (P) => CTA (L)	1
Brassica rapa var. purpuraria	nad1	755	252	255	CCG (P) => CTG (L)	1
Brassica rapa var. purpuraria	nad1	823	275	278	CTC (L) => TTC (F)	0.7
Brassica rapa var. purpuraria	nad1	898	300	303	CGG (R) => TGG (W)	1
Brassica rapa var. purpuraria	nad1	928	310	313	CGG (R) => TGG (W)	1
Brassica rapa var. purpuraria	nad1	937	313	316	CCT (P) => TCT (S)	0.6
Brassica rapa var. purpuraria	nad2	26	9	10	TCC (S) => TTC (F)	0.89
Brassica rapa var. purpuraria	nad2	56	19	20	TCC (S) => TTC (F)	0.67
Brassica rapa var. purpuraria	nad2	119	40	41	GCC (A) => GTC (V)	0.67
Brassica rapa var. purpuraria	nad2	308	103	104	TCT (S) => TTT (F)	0.67
Brassica rapa var. purpuraria	nad2	311	104	105	TCC (S) => TTC (F)	1
Brassica rapa var. purpuraria	nad2	356	119	120	CCA (P) => CTA (L)	1
Brassica rapa var. purpuraria	nad2	361	121	122	CCT (P) => TCT (S)	1
Brassica rapa var. purpuraria	nad2	394	132	133	CAT (H) => TAT (Y)	1
Brassica rapa var. purpuraria	nad2	428	143	144	CCT (P) => CTT (L)	1
Brassica rapa var. purpuraria	nad2	662	221	225	TCT (S) => TTT (F)	1
Brassica rapa var. purpuraria	nad2	788	263	267	TCT (S) => TTT (F)	0.67
Brassica rapa var. purpuraria	nad2	809	270	274	TCT (S) => TTT (F)	1
Brassica rapa var. purpuraria	nad2	920	307	311	CCT (P) => CTT (L)	1
Brassica rapa var. purpuraria	nad2	928	310	314	CAT (H) => TAT (Y)	1
Brassica rapa var. purpuraria	nad2	958	320	324	CGT (R) => TGT (C)	0.78
Brassica rapa var. purpuraria	nad2	962	321	325	ACT (T) => ATT (I)	1
Brassica rapa var. purpuraria	nad2	1058	353	357	TCA (S) => TTA (L)	1
Brassica rapa var. purpuraria	nad2	1127	376	380	TCG (S) => TTG (L)	1
Brassica rapa var. purpuraria	nad2	1247	416	420	CCA (P) => CTA (L)	0.67
Brassica rapa var. purpuraria	nad2	1276	426	430	CGT (R) => TGT (C)	1
Brassica rapa var. purpuraria	nad2	1400	467	471	TCA (S) => TTA (L)	0.67
Brassica rapa var. purpuraria	nad2	1403	468	472	TCC (S) => TTC (F)	1
Brassica rapa var. purpuraria	nad2	1457	486	490	TCA (S) => TTA (L)	1
Brassica rapa var. purpuraria	nad3	5	2	2	TCA (S) => TTA (L)	0.68
Brassica rapa var. purpuraria	nad3	80	27	27	CCA (P) => CTA (L)	1
Brassica rapa var. purpuraria	nad3	146	49	50	TCC (S) => TTC (F)	1
Brassica rapa var. purpuraria	nad3	208	70	71	CCT (P) => TTT (F)	0.95
Brassica rapa var. purpuraria	nad3	209	70	71	CCT (P) => TTT (F)	0.95
Brassica rapa var. purpuraria	nad3	247	83	84	CCT (P) => TCT (S)	1
Brassica rapa var. purpuraria	nad3	251	84	85	CCC (P) => CTC (L)	0.91
Brassica rapa var. purpuraria	nad3	344	115	116	TCG (S) => TTG (L)	1
Brassica rapa var. purpuraria	nad3	349	117	118	CGG (R) => TGG (W)	1
Brassica rapa var. purpuraria	nad4L	8	3	3	CCT (P) => CTT (L)	0.88
Brassica rapa var. purpuraria	nad4L	41	14	14	TCT (S) => TTT (F)	1
Brassica rapa var. purpuraria	nad4L	55	19	19	CGG (R) => TGG (W)	1
Brassica rapa var. purpuraria	nad4L	86	29	29	CCT (P) => CTT (L)	1
Brassica rapa var. purpuraria	nad4L	95	32	32	TCA (S) => TTA (L)	1
Brassica rapa var. purpuraria	nad4L	100	34	34	CCA (P) => TCA (S)	1
Brassica rapa var. purpuraria	nad4L	110	37	37	TCA (S) => TTA (L)	1
Brassica rapa var. purpuraria	nad4L	131	44	44	TCG (S) => TTG (L)	0.88
Brassica rapa var. purpuraria	nad4L	158	53	53	TCG (S) => TTG (L)	1
Brassica rapa var. purpuraria	nad4L	188	63	63	TCA (S) => TTA (L)	0.88
Brassica rapa var. purpuraria	nad4L	197	66	66	CCA (P) => CTA (L)	0.88
Brassica rapa var. purpuraria	nad4	29	10	10	TCT (S) => TTT (F)	0.67
Brassica rapa var. purpuraria	nad4	74	25	25	ACT (T) => ATT (I)	0.89
Brassica rapa var. purpuraria	nad4	77	26	26	CCT (P) => CTT (L)	0.78
Brassica rapa var. purpuraria	nad4	107	36	36	CCG (P) => CTG (L)	1
Brassica rapa var. purpuraria	nad4	158	53	53	CCT (P) => CTT (L)	1
Brassica rapa var. purpuraria	nad4	164	55	55	CCT (P) => CTT (L)	0.67
Brassica rapa var. purpuraria	nad4	166	56	56	CGG (R) => TGG (W)	1
Brassica rapa var. purpuraria	nad4	197	66	66	TCT (S) => TTT (F)	1
Brassica rapa var. purpuraria	nad4	317	106	106	TCA (S) => TTA (L)	1
Brassica rapa var. purpuraria	nad4	362	121	121	ACA (T) => ATA (I)	0.89
Brassica rapa var. purpuraria	nad4	376	126	126	CGT (R) => TGT (C)	0.78
Brassica rapa var. purpuraria	nad4	403	135	135	CGC (R) => TGC (C)	1
Brassica rapa var. purpuraria	nad4	436	146	146	CCC (P) => TTC (F)	0.89
Brassica rapa var. purpuraria	nad4	437	146	146	CCC (P) => TTC (F)	0.89
Brassica rapa var. purpuraria	nad4	449	150	150	CCA (P) => CTA (L)	1
Brassica rapa var. purpuraria	nad4	608	203	203	TCA (S) => TTA (L)	1
Brassica rapa var. purpuraria	nad4	659	220	220	TCT (S) => TTT (F)	1
Brassica rapa var. purpuraria	nad4	767	256	256	CCT (P) => CTT (L)	1
Brassica rapa var. purpuraria	nad4	784	262	262	CAC (H) => TAC (Y)	1
Brassica rapa var. purpuraria	nad4	836	279	279	TCT (S) => TTT (F)	1
Brassica rapa var. purpuraria	nad4	896	299	299	TCA (S) => TTA (L)	0.89
Brassica rapa var. purpuraria	nad4	977	326	326	CCG (P) => CTG (L)	0.78
Brassica rapa var. purpuraria	nad4	1010	337	337	CCG (P) => CTG (L)	1
Brassica rapa var. purpuraria	nad4	1033	345	345	CCT (P) => TCT (S)	1
Brassica rapa var. purpuraria	nad4	1129	377	377	CTC (L) => TTC (F)	1
Brassica rapa var. purpuraria	nad4	1148	383	383	TCT (S) => TTT (F)	0.89
Brassica rapa var. purpuraria	nad4	1172	391	391	TCA (S) => TTA (L)	1
Brassica rapa var. purpuraria	nad4	1205	402	402	CCC (P) => CTC (L)	1
Brassica rapa var. purpuraria	nad4	1355	452	452	TCA (S) => TTA (L)	1
Brassica rapa var. purpuraria	nad4	1373	458	458	TCC (S) => TTC (F)	0.78
Brassica rapa var. purpuraria	nad4	1405	469	469	CGG (R) => TGG (W)	1
Brassica rapa var. purpuraria	nad4	1417	473	473	CAC (H) => TAC (Y)	1
Brassica rapa var. purpuraria	nad4	1433	478	478	CCG (P) => CTG (L)	1
Brassica rapa var. purpuraria	nad5	155	52	52	CCG (P) => CTG (L)	1
Brassica rapa var. purpuraria	nad5	242	81	81	CCG (P) => CTG (L)	1
Brassica rapa var. purpuraria	nad5	272	91	91	TCC (S) => TTC (F)	0.7
Brassica rapa var. purpuraria	nad5	358	120	120	CTT (L) => TTT (F)	1
Brassica rapa var. purpuraria	nad5	374	125	125	CCA (P) => CTA (L)	0.9
Brassica rapa var. purpuraria	nad5	398	133	133	TCT (S) => TTT (F)	0.9
Brassica rapa var. purpuraria	nad5	494	165	165	ACA (T) => ATA (I)	1
Brassica rapa var. purpuraria	nad5	539	180	180	CCT (P) => CTT (L)	1
Brassica rapa var. purpuraria	nad5	548	183	183	TCG (S) => TTG (L)	0.4
Brassica rapa var. purpuraria	nad5	553	185	185	CGT (R) => TGT (C)	1
Brassica rapa var. purpuraria	nad5	598	200	200	CGT (R) => TGT (C)	1
Brassica rapa var. purpuraria	nad5	629	210	213	TCT (S) => TTT (F)	0.9
Brassica rapa var. purpuraria	nad5	676	226	229	CTT (L) => TTT (F)	0.9
Brassica rapa var. purpuraria	nad5	713	238	241	TCG (S) => TTG (L)	1
Brassica rapa var. purpuraria	nad5	725	242	245	TCA (S) => TTA (L)	1
Brassica rapa var. purpuraria	nad5	764	255	258	TCG (S) => TTG (L)	1
Brassica rapa var. purpuraria	nad5	835	279	282	CCA (P) => TCA (S)	0.9
Brassica rapa var. purpuraria	nad5	863	288	291	TCT (S) => TTT (F)	0.8
Brassica rapa var. purpuraria	nad5	875	292	295	ACG (T) => ATG (M)	1
Brassica rapa var. purpuraria	nad5	1361	454	457	TCA (S) => TTA (L)	0.5
Brassica rapa var. purpuraria	nad5	1400	467	470	TCA (S) => TTA (L)	1
Brassica rapa var. purpuraria	nad5	1490	497	500	CCC (P) => CTC (L)	0.8
Brassica rapa var. purpuraria	nad5	1492	498	501	CTC (L) => TTC (F)	0.8
Brassica rapa var. purpuraria	nad5	1550	517	520	ACC (T) => ATC (I)	0.9
Brassica rapa var. purpuraria	nad5	1580	527	530	TCA (S) => TTA (L)	0.8
Brassica rapa var. purpuraria	nad5	1610	537	540	CCC (P) => CTC (L)	0.7
Brassica rapa var. purpuraria	nad5	1895	632	635	TCA (S) => TTA (L)	1
Brassica rapa var. purpuraria	nad5	1916	639	642	TCT (S) => TTT (F)	0.7
Brassica rapa var. purpuraria	nad5	1918	640	643	CGT (R) => TGT (C)	0.7
Brassica rapa var. purpuraria	nad5	1958	653	656	TCG (S) => TTG (L)	0.9
Brassica rapa var. purpuraria	nad6	26	9	11	CCT (P) => CTT (L)	0.4
Brassica rapa var. purpuraria	nad6	53	18	20	GCA (A) => GTA (V)	0.7
Brassica rapa var. purpuraria	nad6	88	30	32	CCC (P) => TTC (F)	0.7
Brassica rapa var. purpuraria	nad6	89	30	32	CCC (P) => TTC (F)	0.7
Brassica rapa var. purpuraria	nad6	95	32	34	CCA (P) => CTA (L)	1
Brassica rapa var. purpuraria	nad6	103	35	37	CGC (R) => TGC (C)	1
Brassica rapa var. purpuraria	nad6	161	54	56	CCA (P) => CTA (L)	1
Brassica rapa var. purpuraria	nad6	169	57	59	CAT (H) => TAT (Y)	1
Brassica rapa var. purpuraria	nad6	191	64	66	TCA (S) => TTA (L)	1
Brassica rapa var. purpuraria	nad6	446	149	151	TCT (S) => TTT (F)	1
Brassica rapa var. purpuraria	nad6	463	155	157	CCT (P) => TCT (S)	0.8
Brassica rapa var. purpuraria	nad7	38	13	13	TCG (S) => TTG (L)	0.75
Brassica rapa var. purpuraria	nad7	77	26	26	TCA (S) => TTA (L)	1
Brassica rapa var. purpuraria	nad7	137	46	46	TCA (S) => TTA (L)	1
Brassica rapa var. purpuraria	nad7	200	67	67	TCT (S) => TTT (F)	1
Brassica rapa var. purpuraria	nad7	209	70	70	TCA (S) => TTA (L)	0.88
Brassica rapa var. purpuraria	nad7	244	82	82	CAT (H) => TAT (Y)	1
Brassica rapa var. purpuraria	nad7	251	84	84	TCA (S) => TTA (L)	1
Brassica rapa var. purpuraria	nad7	316	106	106	CGT (R) => TGT (C)	1
Brassica rapa var. purpuraria	nad7	335	112	112	TCA (S) => TTA (L)	0.88
Brassica rapa var. purpuraria	nad7	344	115	115	TCA (S) => TTA (L)	1
Brassica rapa var. purpuraria	nad7	578	193	193	TCA (S) => TTA (L)	0.88
Brassica rapa var. purpuraria	nad7	679	227	227	CCA (P) => TCA (S)	0.88
Brassica rapa var. purpuraria	nad7	698	233	233	TCG (S) => TTG (L)	1
Brassica rapa var. purpuraria	nad7	724	242	242	CAT (H) => TAT (Y)	1
Brassica rapa var. purpuraria	nad7	734	245	245	TCG (S) => TTG (L)	0.88
Brassica rapa var. purpuraria	nad7	739	247	247	CCT (P) => TTT (F)	1
Brassica rapa var. purpuraria	nad7	740	247	247	CCT (P) => TTT (F)	1
Brassica rapa var. purpuraria	nad7	769	257	257	CGC (R) => TGC (C)	1
Brassica rapa var. purpuraria	nad7	926	309	310	TCA (S) => TTA (L)	0.88
Brassica rapa var. purpuraria	nad7	1057	353	354	CGT (R) => TGT (C)	1
Brassica rapa var. purpuraria	nad7	1088	363	364	TCA (S) => TTA (L)	1
Brassica rapa var. purpuraria	nad7	1103	368	369	TCT (S) => TTT (F)	1
Brassica rapa var. purpuraria	nad7	1124	375	376	CCA (P) => CTA (L)	1
Brassica rapa var. purpuraria	nad9	14	5	5	TCC (S) => TTC (F)	0.67
Brassica rapa var. purpuraria	nad9	92	31	31	TCT (S) => TTT (F)	0.75
Brassica rapa var. purpuraria	nad9	167	56	56	TCG (S) => TTG (L)	0.92
Brassica rapa var. purpuraria	nad9	190	64	64	CAT (H) => TAT (Y)	1
Brassica rapa var. purpuraria	nad9	298	100	100	CCG (P) => TCG (S)	0.83
Brassica rapa var. purpuraria	nad9	328	110	110	CGG (R) => TGG (W)	1
Brassica rapa var. purpuraria	nad9	398	133	133	TCA (S) => TTA (L)	1
Brassica rapa var. purpuraria	nad9	439	147	147	CTT (L) => TTT (F)	1
Brassica rapa var. purpuraria	rpl10	101	34	34	TCG (S) => TTG (L)	0.83
Brassica rapa var. purpuraria	rpl10	134	45	45	CCT (P) => CTT (L)	0.83
Brassica rapa var. purpuraria	rpl16	149	50	156	CCA (P) => CTA (L)	1
Brassica rapa var. purpuraria	rpl16	215	72	178	CCA (P) => CTA (L)	0.89
Brassica rapa var. purpuraria	rpl16	221	74	180	TCG (S) => TTG (L)	0.67
Brassica rapa var. purpuraria	rpl2	212	71	72	CCA (P) => CTA (L)	0.75
Brassica rapa var. purpuraria	rpl2	1004	335	371	TCG (S) => TTG (L)	0.75
Brassica rapa var. purpuraria	rpl5	35	12	21	TCA (S) => TTA (L)	0.78
Brassica rapa var. purpuraria	rpl5	47	16	25	CCG (P) => CTG (L)	1
Brassica rapa var. purpuraria	rpl5	59	20	29	CCG (P) => CTG (L)	0.89
Brassica rapa var. purpuraria	rpl5	64	22	31	CAC (H) => TAC (Y)	1
Brassica rapa var. purpuraria	rpl5	92	31	40	TCG (S) => TTG (L)	1
Brassica rapa var. purpuraria	rpl5	167	56	67	CCG (P) => CTG (L)	0.44
Brassica rapa var. purpuraria	rpl5	169	57	68	CGC (R) => TGC (C)	0.89
Brassica rapa var. purpuraria	rpl5	317	106	125	TCG (S) => TTG (L)	0.89
Brassica rapa var. purpuraria	rpl5	329	110	129	TCG (S) => TTG (L)	0.44
Brassica rapa var. purpuraria	rpl5	512	171	192	CCA (P) => CTA (L)	0.89
Brassica rapa var. purpuraria	rps12	98	33	33	GCA (A) => GTA (V)	0.88
Brassica rapa var. purpuraria	rps12	104	35	35	CCG (P) => CTG (L)	1
Brassica rapa var. purpuraria	rps12	146	49	49	CCA (P) => CTA (L)	1
Brassica rapa var. purpuraria	rps12	196	66	66	CAC (H) => TAC (Y)	0.94
Brassica rapa var. purpuraria	rps12	221	74	74	TCG (S) => TTG (L)	0.88
Brassica rapa var. purpuraria	rps12	269	90	90	TCG (S) => TTG (L)	0.94
Brassica rapa var. purpuraria	rps12	284	95	95	TCC (S) => TTC (F)	0.76
Brassica rapa var. purpuraria	rps14	47	16	16	GCG (A) => GTG (V)	0.6
Brassica rapa var. purpuraria	rps14	194	65	65	TCC (S) => TTC (F)	0.6
Brassica rapa var. purpuraria	rps3	64	22	22	CGG (R) => TGG (W)	1
Brassica rapa var. purpuraria	rps3	311	104	104	GCC (A) => GTC (V)	0.71
Brassica rapa var. purpuraria	rps3	509	170	176	TCA (S) => TTA (L)	0.71
Brassica rapa var. purpuraria	rps3	788	263	281	GCG (A) => GTG (V)	0.71
Brassica rapa var. purpuraria	rps3	1513	505	540	CAT (H) => TAT (Y)	0.71
Brassica rapa var. purpuraria	rps3	1528	510	545	CGT (R) => TGT (C)	1
Brassica rapa var. purpuraria	rps3	1561	521	556	CCT (P) => TCT (S)	0.57
Brassica rapa var. purpuraria	rps3	1592	531	566	TCA (S) => TTA (L)	0.86
Brassica rapa var. purpuraria	rps4	77	26	26	TCA (S) => TTA (L)	0.5
Brassica rapa var. purpuraria	rps4	88	30	30	CGG (R) => TGG (W)	1
Brassica rapa var. purpuraria	rps4	175	59	59	CCG (P) => TCG (S)	0.67
Brassica rapa var. purpuraria	rps4	226	76	76	CCC (P) => TCC (S)	0.83
Brassica rapa var. purpuraria	rps4	235	79	79	CAT (H) => TAT (Y)	1
Brassica rapa var. purpuraria	rps4	299	100	100	CCA (P) => CTA (L)	1
Brassica rapa var. purpuraria	rps4	308	103	103	CCA (P) => CTA (L)	0.83
Brassica rapa var. purpuraria	rps4	332	111	111	CCG (P) => CTG (L)	0.83
Brassica rapa var. purpuraria	rps4	377	126	126	CCG (P) => CTG (L)	1
Brassica rapa var. purpuraria	rps4	506	169	169	TCT (S) => TTT (F)	0.5
Brassica rapa var. purpuraria	rps4	524	175	175	TCA (S) => TTA (L)	1
Brassica rapa var. purpuraria	rps4	956	319	349	TCG (S) => TTG (L)	0.83
Brassica rapa var. purpuraria	rps4	967	323	353	CAT (H) => TAT (Y)	0.83
Brassica rapa var. purpuraria	rps4	977	326	356	CCA (P) => CTA (L)	0.67
Brassica rapa var. purpuraria	rps4	992	331	361	TCT (S) => TTT (F)	1
Brassica rapa var. purpuraria	rps4	1043	348	378	CCA (P) => CTA (L)	0.83
Brassica rapa var. purpuraria	rps4	1052	351	381	CCT (P) => CTT (L)	0.83
Brassica rapa var. purpuraria	rps4	1057	353	383	CGG (R) => TGG (W)	0.83
Brassica rapa var. purpuraria	rps7	116	39	39	CCA (P) => CTA (L)	0.75
Brassica rapa var. purpuraria	rps7	332	111	131	TCA (S) => TTA (L)	0.88
