# Supplementary material for: Assembly and comparative analysis of the first complete mitochondrial genome of zicaitai (Brassica rapa var. Purpuraria): insights into its genetic architecture and evolutionary relationships
Source: Front Plant Sci. 2024 Oct 10;15:1475064. doi: 10.3389/fpls.2024.1475064 (PMC11499134; doi:10.3389/fpls.2024.1475064)
Supplement: Supplementary file 6 [file Table5.xlsx]

## Sheet: Table S5
Table S5 Single-copy orthologous mitochondrial genes common to 21 species within the Brassica genus and its closely related genera.
Arabidopsis thaliana	atp1(+)	atp4(+)	atp6(+)	atp8(+)	atp9(+)	ccmB(+)	ccmC(+)	ccmFc(+)	ccmFn(+)	cob(+)	cox1(+)	cox2(+)	cox3(+)	matR(+)	nad1(+)	nad2(+)	nad3(+)	nad4(+)	nad4L(+)	nad5(+)	nad6(+)	nad7(+)	nad9(+)	rpl2(+)	rpl5(+)	rps12(+)	rps14(-)	rps3(+)	rps4(+)	rps7(+)
Batis maritima	atp1(+)	atp4(+)	atp6(+)	atp8(+)	atp9(+)	ccmB(+)	ccmC(+)	ccmFc(+)	ccmFn(+)	cob(+)	cox1(+)	cox2(+)	cox3(+)	matR(+)	nad1(+)	nad2(+)	nad3(+)	nad4(+)	nad4L(+)	nad5(+)	nad6(+)	nad7(+)	nad9(+)	rpl2(+)	rpl5(+)	rps12(+)	rps14(+)	rps3(+)	rps4(+)	rps7(+)
Boechera stricta	atp1(+)	atp4(+)	atp6(+)	atp8(+)	atp9(+)	ccmB(+)	ccmC(+)	ccmFc(+)	ccmFn(+)	cob(+)	cox1(+)	cox2(+)	cox3(+)	matR(+)	nad1(+)	nad2(+)	nad3(+)	nad4(+)	nad4L(+)	nad5(+)	nad6(+)	nad7(+)	nad9(+)	rpl2(+)	rpl5(+)	rps12(+)	rps14(-)	rps3(+)	rps4(+)	rps7(-)
Brassica carinata	atp1(+)	atp4(+)	atp6(+)	atp8(+)	atp9(+)	ccmB(+)	ccmC(+)	ccmFc(+)	ccmFn(+)	cob(+)	cox1(+)	cox2(+)	cox3(+)	matR(+)	nad1(+)	nad2(+)	nad3(+)	nad4(+)	nad4L(+)	nad5(+)	nad6(+)	nad7(+)	nad9(+)	rpl2(+)	rpl5(+)	rps12(+)	rps14(+)	rps3(+)	rps4(+)	rps7(+)
Brassica juncea	atp1(+)	atp4(+)	atp6(+)	atp8(+)	atp9(+)	ccmB(+)	ccmC(+)	ccmFc(+)	ccmFn(+)	cob(+)	cox1(+)	cox2(+)	cox3(+)	matR(+)	nad1(+)	nad2(+)	nad3(+)	nad4(+)	nad4L(+)	nad5(+)	nad6(+)	nad7(+)	nad9(+)	rpl2(+)	rpl5(+)	rps12(+)	rps14(+)	rps3(+)	rps4(+)	rps7(+)
Brassica napus	atp1(+)	atp4(+)	atp6(+)	atp8(+)	atp9(+)	ccmB(+)	ccmC(+)	ccmFc(+)	ccmFn(+)	cob(+)	cox1(+)	cox2(+)	cox3(+)	matR(+)	nad1(+)	nad2(+)	nad3(+)	nad4(+)	nad4L(+)	nad5(+)	nad6(+)	nad7(+)	nad9(+)	rpl2(+)	rpl5(+)	rps12(+)	rps14(+)	rps3(+)	rps4(+)	rps7(+)
Brassica nigra	atp1(+)	atp4(+)	atp6(+)	atp8(+)	atp9(+)	ccmB(+)	ccmC(+)	ccmFc(-)	ccmFn(+)	cob(+)	cox1(+)	cox2(+)	cox3(+)	matR(+)	nad1(+)	nad2(-)	nad3(+)	nad4(-)	nad4L(+)	nad5(-)	nad6(+)	nad7(-)	nad9(+)	rpl2(+)	rpl5(+)	rps12(+)	rps14(+)	rps3(+)	rps4(+)	rps7(+)
Brassica oleracea	atp1(+)	atp4(+)	atp6(+)	atp8(+)	atp9(+)	ccmB(+)	ccmC(+)	ccmFc(+)	ccmFn(+)	cob(+)	cox1(+)	cox2(+)	cox3(+)	matR(+)	nad1(+)	nad2(+)	nad3(+)	nad4(+)	nad4L(+)	nad5(+)	nad6(+)	nad7(+)	nad9(+)	rpl2(+)	rpl5(+)	rps12(+)	rps14(+)	rps3(+)	rps4(+)	rps7(+)
Brassica oxyrrhina	atp1(+)	atp4(+)	atp6(+)	atp8(+)	atp9(+)	ccmB(+)	ccmC(+)	ccmFc(-)	ccmFn(+)	cob(+)	cox1(+)	cox2(+)	cox3(+)	matR(-)	nad1(-)	nad2(+)	nad3(+)	nad4(+)	nad4L(+)	nad5(+)	nad6(+)	nad7(+)	nad9(+)	rpl2(+)	rpl5(+)	rps12(+)	rps14(+)	rps3(+)	rps4(+)	rps7(-)
Brassica rapa	atp1(+)	atp4(+)	atp6(+)	atp8(+)	atp9(+)	ccmB(+)	ccmC(+)	ccmFc(+)	ccmFn(+)	cob(+)	cox1(+)	cox2(+)	cox3(+)	matR(+)	nad1(+)	nad2(+)	nad3(+)	nad4(+)	nad4L(+)	nad5(+)	nad6(+)	nad7(+)	nad9(+)	rpl2(+)	rpl5(+)	rps12(+)	rps14(+)	rps3(+)	rps4(+)	rps7(+)
Brassica rapa subsp. nipposinica	atp1(+)	atp4(+)	atp6(+)	atp8(+)	atp9(+)	ccmB(+)	ccmC(+)	ccmFc(+)	ccmFn(+)	cob(+)	cox1(+)	cox2(+)	cox3(+)	matR(-)	nad1(-)	nad2(+)	nad3(+)	nad4(+)	nad4L(+)	nad5(+)	nad6(+)	nad7(+)	nad9(+)	rpl2(+)	rpl5(+)	rps12(+)	rps14(+)	rps3(+)	rps4(+)	rps7(+)
Brassica rapa subsp. oleifera	atp1(+)	atp4(+)	atp6(+)	atp8(+)	atp9(+)	ccmB(+)	ccmC(+)	ccmFc(+)	ccmFn(+)	cob(+)	cox1(+)	cox2(+)	cox3(+)	matR(+)	nad1(+)	nad2(+)	nad3(+)	nad4(+)	nad4L(+)	nad5(+)	nad6(+)	nad7(+)	nad9(+)	rpl2(+)	rpl5(+)	rps12(+)	rps14(+)	rps3(+)	rps4(+)	rps7(+)
Brassica rapa var. purpuraria	atp1(+)	atp4(+)	atp6(+)	atp8(+)	atp9(+)	ccmB(+)	ccmC(+)	ccmFc(+)	ccmFn(+)	cob(+)	cox1(+)	cox2(+)	cox3(+)	matR(+)	nad1(+)	nad2(+)	nad3(+)	nad4(+)	nad4L(+)	nad5(+)	nad6(+)	nad7(+)	nad9(+)	rpl2(+)	rpl5(+)	rps12(+)	rps14(+)	rps3(+)	rps4(+)	rps7(+)
Capsella bursa-pastoris	atp1(+)	atp4(+)	atp6(+)	atp8(+)	atp9(+)	ccmB(+)	ccmC(+)	ccmFc(+)	ccmFn(+)	cob(+)	cox1(+)	cox2(+)	cox3(+)	matR(+)	nad1(+)	nad2(+)	nad3(+)	nad4(+)	nad4L(+)	nad5(+)	nad6(+)	nad7(+)	nad9(+)	rpl2(+)	rpl5(+)	rps12(+)	rps14(-)	rps3(+)	rps4(+)	rps7(+)
Capsella rubella	atp1(+)	atp4(+)	atp6(+)	atp8(+)	atp9(+)	ccmB(+)	ccmC(+)	ccmFc(+)	ccmFn(+)	cob(+)	cox1(+)	cox2(+)	cox3(+)	matR(+)	nad1(+)	nad2(+)	nad3(+)	nad4(+)	nad4L(+)	nad5(+)	nad6(+)	nad7(+)	nad9(+)	rpl2(+)	rpl5(+)	rps12(+)	rps14(-)	rps3(+)	rps4(+)	rps7(+)
Carica papaya	atp1(+)	atp4(+)	atp6(+)	atp8(+)	atp9(+)	ccmB(+)	ccmC(+)	ccmFc(+)	ccmFn(+)	cob(+)	cox1(+)	cox2(+)	cox3(+)	matR(+)	nad1(+)	nad2(+)	nad3(+)	nad4(+)	nad4L(+)	nad5(+)	nad6(+)	nad7(+)	nad9(+)	rpl2(+)	rpl5(+)	rps12(+)	rps14(+)	rps3(+)	rps4(+)	rps7(+)
Eruca vesicaria subsp. sativa	atp1(+)	atp4(+)	atp6(+)	atp8(+)	atp9(+)	ccmB(+)	ccmC(+)	ccmFc(+)	ccmFn(+)	cob(+)	cox1(+)	cox2(+)	cox3(+)	matR(+)	nad1(+)	nad2(+)	nad3(+)	nad4(+)	nad4L(+)	nad5(+)	nad6(+)	nad7(+)	nad9(+)	rpl2(+)	rpl5(+)	rps12(+)	rps14(+)	rps3(+)	rps4(+)	rps7(+)
Raphanus sativus	atp1(+)	atp4(+)	atp6(+)	atp8(+)	atp9(+)	ccmB(+)	ccmC(+)	ccmFc(+)	ccmFn(+)	cob(+)	cox1(+)	cox2(+)	cox3(+)	matR(+)	nad1(+)	nad2(+)	nad3(+)	nad4(+)	nad4L(+)	nad5(+)	nad6(+)	nad7(+)	nad9(+)	rpl2(+)	rpl5(+)	rps12(+)	rps14(+)	rps3(+)	rps4(+)	rps7(+)
Schrenkiella parvula	atp1(+)	atp4(-)	atp6(-)	atp8(-)	atp9(+)	ccmB(+)	ccmC(+)	ccmFc(-)	ccmFn(+)	cob(+)	cox1(-)	cox2(+)	cox3(+)	matR(+)	nad1(+)	nad2(+)	nad3(-)	nad4(+)	nad4L(+)	nad5(+)	nad6(+)	nad7(+)	nad9(+)	rpl2(+)	rpl5(+)	rps12(-)	rps14(-)	rps3(-)	rps4(+)	rps7(+)
Sinapis arvensis	atp1(+)	atp4(+)	atp6(+)	atp8(+)	atp9(+)	ccmB(+)	ccmC(+)	ccmFc(+)	ccmFn(+)	cob(+)	cox1(+)	cox2(+)	cox3(+)	matR(+)	nad1(+)	nad2(+)	nad3(+)	nad4(+)	nad4L(+)	nad5(+)	nad6(+)	nad7(+)	nad9(+)	rpl2(+)	rpl5(+)	rps12(+)	rps14(+)	rps3(-)	rps4(+)	rps7(+)
Turritis glabra	atp1(+)	atp4(+)	atp6(+)	atp8(+)	atp9(+)	ccmB(+)	ccmC(+)	ccmFc(+)	ccmFn(+)	cob(+)	cox1(+)	cox2(+)	cox3(+)	matR(+)	nad1(+)	nad2(+)	nad3(+)	nad4(+)	nad4L(+)	nad5(+)	nad6(+)	nad7(+)	nad9(+)	rpl2(+)	rpl5(+)	rps12(+)	rps14(-)	rps3(+)	rps4(+)	rps7(+)
