# Supplementary material for: Assembly and comparative analysis of the first complete mitochondrial genome of zicaitai (Brassica rapa var. Purpuraria): insights into its genetic architecture and evolutionary relationships
Source: Front Plant Sci. 2024 Oct 10;15:1475064. doi: 10.3389/fpls.2024.1475064 (PMC11499134; doi:10.3389/fpls.2024.1475064)
Supplement: Supplementary file 7 [file Table6.xlsx]

## Sheet: Table S6
Table S6 List of gene transfer events between the nuclear genome and mitogenome of zicaitai.
Organelle genome (query)	No. of zicaitai chromosome (subject)	Sequence similarity	Alignment length of homologous sequences	Number of SNPs	Insertions/Deletions Count	Start position of query	End position of query	Start position of subject	End position of subject	E value	Score for BLAST	Genes of the organelle
mitogenome	6	99.559	57885	179	20	42151	99987	7411584	7469440	0	105400	nad2-exon3,nad2-exon4,nad2-exon5,nad2-intron2,nad2-intron3,nad5-exon3,trnQ-TTG,atp6,trnM-CAT,atp4,nad4L,cox1,trnN-GTT,trnY-GTA,trnD-GTC,trnK-TTT,rps3-intron1,rps3-exon1,rps3-exon2,rpl16,rpl5,rps14,cob,trnS-GGA,cox2-intron1,cox2-exon1,cox2-exon2,ccmFc-intron1,ccmFc-exon1,ccmFc-exon2,trnG-GCC,cox3
mitogenome	6	99.553	22160	56	13	19999	42153	7387135	7409256	0	40333	nad7-intron1,nad7-intron2,nad7-intron3,nad7-exon1,nad7-exon2,nad7-exon3,nad7-exon4(partical:18.44%),atp8,trnC-GCA,trnP-TGG,trnE-TTC,trnL-CAA,trnW-CCA,trnS-GCT,trnH-GTG,nad5-exon4,nad5-exon5,nad5-intron2,nad9
mitogenome	6	99.671	12457	33	4	1	12450	7479736	7492191	0	22770	ccmC,trnI-AAT-intron1,trnI-AAT-exon1,trnI-AAT-exon2,nad2-exon1,nad2-exon2,nad2-intron1,rpl10,rps4(partical:18.55%)
mitogenome	6	99.787	10313	18	2	209467	219779	7469427	7479735	0	18920	rrn18,rrn5
mitogenome	6	99.38	5804	13	3	16832	22622	7496515	7502308	0	10497	nad7-intron2(partical:95.58%),nad7-intron3,nad7-intron4,nad7-exon3,nad7-exon4,nad7-exon5
mitogenome	6	99.472	4738	12	2	1	4725	7330185	7325448	0	8599	-
mitogenome	6	99.793	4339	5	2	12479	16814	7492189	7496526	0	7960	rps4(partical:78.88%)
mitogenome	6	99.794	2429	3	1	82648	85074	7479736	7482164	0	4457	cox2-intron1,cox2-exon1,cox2-exon2(partical:30.12%)
mitogenome	6	99.671	2432	6	2	82648	85078	7330185	7327755	0	4446	cox2-intron1,cox2-exon1,cox2-exon2(partical:30.12%)
mitogenome	6	99.629	2428	8	1	1	2427	7452101	7454528	0	4433	-
mitogenome	6	99.202	1002	4	2	218781	219779	7331186	7330186	0	1803	-
mitogenome	6	99.346	306	2	0	175354	175659	7465748	7465443	8.16e-154	555	-
mitogenome	6	91.176	408	36	0	32859	33266	18760683	18760276	8.16e-154	555	-
mitogenome	6	89.646	396	28	3	120365	120758	16788562	16788946	6.49e-135	492	-
mitogenome	6	96.269	268	10	0	140845	141112	7428339	7428606	2.38e-119	440	nad6(partical:16.99%)
mitogenome	6	91.197	284	16	5	112770	113050	7395148	7394871	1.89e-100	377	-
mitogenome	6	99.005	201	1	1	122915	123115	22024853	22024654	6.86e-95	359	-
mitogenome	6	85.662	272	29	4	67338	67603	26214205	26214472	1.98e-70	278	nad2-exon4(partical:46.42%)
mitogenome	6	98.684	152	1	1	120811	120961	7404430	7404279	1.19e-67	268	trnH-GTG-2
mitogenome	6	99.32	147	0	1	203235	203380	7474802	7474656	1.54e-66	265	-
mitogenome	6	84.871	271	28	5	62368	62625	14660684	14660414	1.99e-65	261	-
mitogenome	6	98.571	140	2	0	60814	60953	7395174	7395313	1.55e-61	248	cox1(partical:0.57%)
mitogenome	6	97.872	141	2	1	28035	28174	7430232	7430372	7.21e-60	243	-
mitogenome	6	85.433	254	11	14	169943	170195	7394216	7393988	2.59e-59	241	-
mitogenome	6	99.248	133	0	1	110640	110771	7393017	7393149	9.33e-59	239	-
mitogenome	6	92.262	168	9	4	165796	165961	7393045	7393210	1.21e-57	235	-
mitogenome	6	97.122	139	4	0	40623	40761	15979202	15979340	1.21e-57	235	-
mitogenome	6	100	118	0	0	25662	25779	19199371	19199488	1.22e-52	219	atp8(partical:24.74%)
mitogenome	6	97.6	125	3	0	66006	66130	15475918	15475794	1.57e-51	215	nad2-intron2(partical:5.76%)
mitogenome	6	93.197	147	8	1	188204	188350	27291183	27291039	1.57e-51	215	-
mitogenome	6	95.455	132	6	0	183333	183464	15554474	15554343	2.03e-50	211	rrn26(partical:4.16%)
mitogenome	6	97.479	119	3	0	70985	71103	4726733	4726615	3.4e-48	204	-
mitogenome	6	96.61	118	3	1	158242	158359	15504937	15505053	2.05e-45	195	nad4-exon1(partical:25.60%)
mitogenome	6	95.798	119	5	0	70985	71103	20179701	20179819	7.37e-45	193	-
mitogenome	6	96.117	103	4	0	24441	24543	4726827	4726725	1.24e-37	169	-
mitogenome	6	96.117	103	4	0	24441	24543	20179607	20179709	1.24e-37	169	-
mitogenome	6	95.96	99	4	0	199989	200087	7395148	7395050	2.08e-35	161	nad5-exon1(partical:43.23%)
mitogenome	6	91.818	110	9	0	42371	42480	7454737	7454628	3.48e-33	154	-
mitogenome	6	91.667	108	9	0	85176	85283	7411911	7411804	4.5e-32	150	-
mitogenome	6	91.509	106	9	0	119418	119523	7469711	7469816	5.82e-31	147	-
mitogenome	6	100	78	0	0	163895	163972	7421194	7421117	2.09e-30	145	rpl2-intron1(partical:4.57%)
mitogenome	6	95.506	89	4	0	55568	55656	3949531	3949443	7.52e-30	143	atp4(partical:15.37%)
mitogenome	6	96.512	86	3	0	185757	185842	4616934	4617019	7.52e-30	143	-
mitogenome	6	100	77	0	0	187674	187750	18565948	18565872	7.52e-30	143	-
mitogenome	6	89.381	113	7	1	125005	125117	15505157	15505050	3.5e-28	137	-
mitogenome	6	97.468	79	1	1	114515	114592	7330799	7330877	4.53e-27	134	rps12(partical:11.11%)
mitogenome	6	93.407	91	5	1	167964	168054	7404004	7404093	4.53e-27	134	-
mitogenome	6	96.296	81	3	0	27081	27161	7471356	7471276	4.53e-27	134	-
mitogenome	6	97.468	79	1	1	114515	114592	7479124	7479046	4.53e-27	134	rps12(partical:11.11%)
mitogenome	6	98.611	72	1	0	23687	23758	3949443	3949372	2.11e-25	128	nad7-intron1(partical:4.92%),nad7-exon1(partical:16.08%)
mitogenome	6	79.487	195	28	7	91351	91543	27365031	27365215	2.11e-25	128	-
mitogenome	6	100	62	0	0	169999	170060	6393491	6393430	1.64e-21	115	-
mitogenome	6	98.462	65	1	0	183596	183660	15475984	15475920	1.64e-21	115	rrn26(partical:2.05%)
mitogenome	6	100	62	0	0	106219	106280	22225996	22226057	1.64e-21	115	-
mitogenome	6	100	60	0	0	66804	66863	17132292	17132233	2.12e-20	111	nad2-intron2(partical:2.76%)
mitogenome	6	96.97	66	1	1	203308	203373	23358364	23358300	7.63e-20	110	-
mitogenome	6	96.97	66	1	1	214706	214771	23358300	23358364	7.63e-20	110	-
mitogenome	6	94.366	71	1	1	69038	69108	7395375	7395308	9.87e-19	106	nad2-intron3(partical:4.12%)
mitogenome	6	96.825	63	2	0	162677	162739	28702291	28702353	9.87e-19	106	-
mitogenome	6	96.825	63	2	0	63097	63159	29313829	29313767	9.87e-19	106	-
mitogenome	6	95.385	65	3	0	175661	175725	7421042	7421106	3.55e-18	104	trnM-CAT-2(partical:31.08%)
mitogenome	6	96.774	62	2	0	200605	200666	7443512	7443573	3.55e-18	104	nad5-intron1(partical:7.39%)
mitogenome	6	93.151	73	0	1	16921	16993	7475768	7475701	1.28e-17	102	-
mitogenome	6	93.151	73	0	1	215744	215811	7496677	7496605	1.28e-17	102	-
mitogenome	6	100	55	0	0	183935	183989	15554525	15554471	1.28e-17	102	rrn26(partical:1.73%)
mitogenome	6	92.958	71	2	1	28198	28265	7438541	7438471	4.59e-17	100	-
mitogenome	6	98.214	56	1	0	147782	147837	7493417	7493472	1.65e-16	99	-
mitogenome	6	98.182	55	1	0	62854	62908	3684326	3684272	5.94e-16	97.1	-
mitogenome	6	96.61	59	1	1	12120	12177	7446810	7446752	5.94e-16	97.1	-
mitogenome	6	96.61	59	1	1	77299	77357	7491918	7491861	5.94e-16	97.1	-
mitogenome	6	98.113	53	1	0	51723	51775	7396231	7396179	7.69e-15	93.5	-
mitogenome	6	100	50	0	0	163895	163944	7396182	7396231	7.69e-15	93.5	rpl2-intron1(partical:2.93%)
mitogenome	6	100	50	0	0	29077	29126	7421194	7421145	7.69e-15	93.5	-
mitogenome	6	94.915	59	2	1	79058	79116	7395353	7395296	2.76e-14	91.6	-
mitogenome	6	92.308	65	4	1	28186	28249	7448569	7448505	2.76e-14	91.6	-
mitogenome	6	100	49	0	0	101870	101918	7490095	7490047	2.76e-14	91.6	nad1-intron1(partical:5.30%)
mitogenome	6	96.154	52	2	0	65598	65649	7388986	7388935	1.29e-12	86.1	nad2-intron2(partical:2.40%)
mitogenome	6	100	46	0	0	199115	199160	7443926	7443881	1.29e-12	86.1	nad1-intron2(partical:1.33%)
mitogenome	6	96.154	52	2	0	65598	65649	7501534	7501483	1.29e-12	86.1	nad2-intron2(partical:2.40%)
mitogenome	6	97.959	49	0	1	44064	44112	6648949	6648902	4.63e-12	84.2	-
mitogenome	6	100	45	0	0	145250	145294	17293627	17293583	4.63e-12	84.2	-
mitogenome	6	100	45	0	0	189738	189782	26679406	26679362	4.63e-12	84.2	-
mitogenome	6	97.872	47	1	0	128455	128501	3763501	3763455	1.66e-11	82.4	-
mitogenome	6	97.917	48	0	1	71659	71706	7434992	7435038	1.66e-11	82.4	-
mitogenome	6	97.917	48	0	1	65572	65618	7441091	7441138	1.66e-11	82.4	nad2-intron2(partical:2.17%)
mitogenome	6	89.231	65	7	0	200578	200642	17505725	17505661	1.66e-11	82.4	nad5-intron1(partical:7.75%)
mitogenome	6	87.324	71	7	2	69038	69108	7430406	7430338	5.98e-11	80.5	nad2-intron3(partical:4.12%)
mitogenome	6	94.34	53	2	1	71535	71587	7441003	7441054	5.98e-11	80.5	-
mitogenome	6	89.231	65	5	2	69065	69127	7448513	7448577	5.98e-11	80.5	nad2-intron3(partical:3.66%)
mitogenome	6	95.918	49	2	0	185868	185916	7469759	7469711	5.98e-11	80.5	-
mitogenome	6	100	43	0	0	205318	205360	23640793	23640751	5.98e-11	80.5	-
mitogenome	6	97.778	45	1	0	51354	51398	7326095	7326139	2.15e-10	78.7	atp6(partical:5.73%)
mitogenome	6	97.778	45	1	0	4046	4090	7420821	7420777	2.15e-10	78.7	-
mitogenome	6	97.778	45	1	0	51354	51398	7483827	7483783	2.15e-10	78.7	atp6(partical:5.73%)
mitogenome	6	97.778	45	1	0	35132	35176	23358364	23358408	2.15e-10	78.7	-
mitogenome	6	100	41	0	0	170364	170404	7472102	7472062	7.74e-10	76.8	-
mitogenome	6	97.778	45	0	1	209255	209299	7474998	7475041	7.74e-10	76.8	-
mitogenome	6	86.765	68	9	0	198392	198459	16788972	16789039	7.74e-10	76.8	nad1-intron2(partical:1.97%),matR(partical:3.44%)
mitogenome	6	100	41	0	0	110140	110180	28702294	28702254	7.74e-10	76.8	-
mitogenome	6	100	40	0	0	215764	215803	7414131	7414092	2.78e-09	75	-
mitogenome	6	100	40	0	0	16929	16968	7414092	7414131	2.78e-09	75	-
mitogenome	6	94	50	1	2	28156	28203	7430323	7430372	2.78e-09	75	-
mitogenome	6	100	40	0	0	154877	154916	7472062	7472101	2.78e-09	75	nad4-intron2(partical:1.30%)
mitogenome	6	100	40	0	0	44659	44698	7475760	7475721	2.78e-09	75	-
mitogenome	6	100	40	0	0	44659	44698	7496613	7496652	2.78e-09	75	-
mitogenome	6	100	39	0	0	159780	159818	7396184	7396222	1e-08	73.1	-
mitogenome	6	100	39	0	0	212109	212147	7421152	7421114	1e-08	73.1	-
mitogenome	6	97.619	42	1	0	159780	159821	7421192	7421151	1e-08	73.1	-
mitogenome	6	82.558	86	11	2	113774	113858	7426627	7426545	1e-08	73.1	nad3(partical:23.53%)
mitogenome	6	92.308	52	3	1	71572	71622	7440968	7441019	1e-08	73.1	-
mitogenome	6	97.619	42	1	0	101453	101494	7472062	7472103	1e-08	73.1	nad1-intron1(partical:4.54%)
mitogenome	6	100	39	0	0	51692	51730	7472104	7472066	1e-08	73.1	-
mitogenome	6	97.619	42	0	1	60919	60959	7329840	7329881	3.6e-08	71.3	-
mitogenome	6	97.619	42	0	1	82952	82993	7430378	7430338	3.6e-08	71.3	cox2-intron1(partical:3.11%)
mitogenome	6	97.619	42	0	1	305	346	7430378	7430338	3.6e-08	71.3	-
mitogenome	6	97.619	42	0	1	60919	60959	7452446	7452405	3.6e-08	71.3	-
mitogenome	6	100	38	0	0	42453	42490	7454584	7454547	3.6e-08	71.3	-
mitogenome	6	97.619	42	0	1	60919	60959	7480081	7480040	3.6e-08	71.3	-
mitogenome	6	100	38	0	0	180918	180955	26571504	26571467	3.6e-08	71.3	-
mitogenome	6	90.566	53	3	2	214146	214198	3949246	3949196	1.3e-07	69.4	-
mitogenome	6	90.566	53	3	2	88107	88157	7396184	7396236	1.3e-07	69.4	-
mitogenome	6	95.349	43	2	0	154881	154923	7421152	7421110	1.3e-07	69.4	nad4-intron2(partical:1.40%)
mitogenome	6	100	37	0	0	170364	170400	7421116	7421152	1.3e-07	69.4	-
mitogenome	6	97.5	40	1	0	28157	28196	7448569	7448530	1.3e-07	69.4	-
mitogenome	6	90.566	53	3	2	29079	29131	7457561	7457611	1.3e-07	69.4	-
mitogenome	6	97.5	40	1	0	32976	33015	18226099	18226138	1.3e-07	69.4	-
mitogenome	6	97.5	40	1	0	63107	63146	20958096	20958057	1.3e-07	69.4	-
mitogenome	6	95.455	44	1	1	853	895	28702482	28702525	1.3e-07	69.4	-
mitogenome	6	95.455	44	1	1	83500	83542	28702482	28702525	1.3e-07	69.4	cox2-intron1(partical:3.19%)
mitogenome	6	95.349	43	0	2	28260	28300	7329840	7329882	4.66e-07	67.6	trnC-GCA(partical:12.68%)
mitogenome	6	95.349	43	0	2	82951	82993	7395410	7395370	4.66e-07	67.6	cox2-intron1(partical:3.19%)
mitogenome	6	95.349	43	0	2	304	346	7395410	7395370	4.66e-07	67.6	-
mitogenome	6	100	36	0	0	121085	121120	7418333	7418298	4.66e-07	67.6	-
mitogenome	6	95.349	43	0	2	28260	28300	7452446	7452404	4.66e-07	67.6	trnC-GCA(partical:12.68%)
mitogenome	6	93.617	47	0	3	160371	160417	7472101	7472058	4.66e-07	67.6	-
mitogenome	6	100	36	0	0	163937	163972	7472066	7472101	4.66e-07	67.6	rpl2-intron1(partical:2.11%)
mitogenome	6	95.349	43	0	2	28260	28300	7480081	7480039	4.66e-07	67.6	trnC-GCA(partical:12.68%)
mitogenome	6	97.368	38	1	0	98699	98736	1165628	1165665	1.68e-06	65.8	-
mitogenome	6	97.368	38	1	0	98699	98736	1337131	1337094	1.68e-06	65.8	-
mitogenome	6	97.368	38	1	0	98699	98736	1473403	1473366	1.68e-06	65.8	-
mitogenome	6	97.368	38	1	0	98699	98736	4350624	4350661	1.68e-06	65.8	-
mitogenome	6	100	35	0	0	28140	28174	7329840	7329874	1.68e-06	65.8	-
mitogenome	6	100	35	0	0	28169	28203	7329840	7329874	1.68e-06	65.8	-
mitogenome	6	100	35	0	0	28260	28294	7395279	7395313	1.68e-06	65.8	trnC-GCA(partical:4.23%)
mitogenome	6	100	35	0	0	82959	82993	7395313	7395279	1.68e-06	65.8	cox2-intron1(partical:2.59%)
mitogenome	6	100	35	0	0	312	346	7395313	7395279	1.68e-06	65.8	-
mitogenome	6	100	35	0	0	28140	28174	7395370	7395404	1.68e-06	65.8	-
mitogenome	6	100	35	0	0	28169	28203	7395370	7395404	1.68e-06	65.8	-
mitogenome	6	100	35	0	0	60919	60953	7395370	7395404	1.68e-06	65.8	-
mitogenome	6	100	35	0	0	88118	88152	7421179	7421145	1.68e-06	65.8	-
mitogenome	6	100	35	0	0	28260	28294	7430338	7430372	1.68e-06	65.8	trnC-GCA(partical:4.23%)
mitogenome	6	100	35	0	0	95344	95378	7446826	7446860	1.68e-06	65.8	-
mitogenome	6	100	35	0	0	28169	28203	7452446	7452412	1.68e-06	65.8	-
mitogenome	6	100	35	0	0	28140	28174	7452446	7452412	1.68e-06	65.8	-
mitogenome	6	91.667	48	2	2	163897	163944	7457561	7457606	1.68e-06	65.8	rpl2-intron1(partical:2.81%)
mitogenome	6	91.667	48	2	2	51723	51770	7457606	7457561	1.68e-06	65.8	-
mitogenome	6	100	35	0	0	28169	28203	7480081	7480047	1.68e-06	65.8	-
mitogenome	6	100	35	0	0	28140	28174	7480081	7480047	1.68e-06	65.8	-
mitogenome	6	100	35	0	0	65598	65632	7485972	7485938	1.68e-06	65.8	nad2-intron2(partical:1.61%)
mitogenome	6	97.368	38	1	0	98699	98736	21281556	21281519	1.68e-06	65.8	-
mitogenome	6	97.368	38	1	0	98699	98736	21281816	21281779	1.68e-06	65.8	-
mitogenome	6	97.368	38	1	0	98699	98736	23132152	23132115	1.68e-06	65.8	-
mitogenome	6	95.122	41	0	2	192219	192259	2617513	2617551	6.03e-06	63.9	-
mitogenome	6	100	34	0	0	206052	206085	7404540	7404573	6.03e-06	63.9	-
mitogenome	6	100	34	0	0	160371	160404	7421117	7421150	6.03e-06	63.9	-
mitogenome	6	93.182	44	1	2	79045	79087	7438410	7438452	6.03e-06	63.9	-
mitogenome	6	93.182	44	1	2	68977	69019	7448498	7448540	6.03e-06	63.9	nad2-intron3(partical:2.50%)
mitogenome	10	99.819	8296	9	1	1	8290	29566720	29558425	0	15232	ccmC,trnI-AAT-intron1,trnI-AAT-exon1,trnI-AAT-exon2
mitogenome	10	99.589	2436	4	1	82648	85077	29566720	29564285	0	4438	cox2-intron1,cox2-exon1,cox2-exon2(partical:30.12%)
mitogenome	10	98.811	2186	26	0	108052	110237	30226276	30224091	0	3893	-
mitogenome	10	98.765	2186	27	0	108052	110237	30049827	30047642	0	3888	-
mitogenome	10	98.765	2186	27	0	108052	110237	30166031	30168216	0	3888	-
mitogenome	10	99.666	2096	7	0	217684	219779	29568816	29566721	0	3832	-
mitogenome	10	97.653	1875	29	5	31621	33491	29935227	29933364	0	3205	trnL-CAA
mitogenome	10	97.604	1878	30	5	31618	33491	29979818	29981684	0	3205	trnL-CAA
mitogenome	10	97.653	1875	29	5	31621	33491	30083048	30081185	0	3205	trnL-CAA
mitogenome	10	97.551	1878	30	6	31618	33491	30132817	30134682	0	3199	trnL-CAA
mitogenome	10	96.41	1365	39	3	141234	142593	29897182	29895823	0	2241	-
mitogenome	10	96.41	1365	39	3	141234	142593	30017883	30019242	0	2241	-
mitogenome	10	96.41	1365	39	3	141234	142593	30197966	30196607	0	2241	-
mitogenome	10	94.448	1423	39	7	195061	196457	13283293	13284701	0	2154	nad1-exon4,nad1-intron2(partical:11.77%)
mitogenome	10	95.102	1368	53	5	141234	142593	16123600	16124961	0	2143	-
mitogenome	10	99.655	1159	4	0	62160	63318	29964092	29965250	0	2119	trnN-GTT
mitogenome	10	99.655	1159	4	0	62160	63318	30117093	30118251	0	2119	trnN-GTT
mitogenome	10	99.569	1160	4	1	62160	63318	30098778	30097619	0	2113	trnN-GTT
mitogenome	10	96.206	659	19	3	37529	38183	29883064	29882408	0	1074	-
mitogenome	10	96.206	659	19	3	37529	38183	30183846	30183190	0	1074	-
mitogenome	10	96.206	659	19	3	37529	38183	30208459	30209115	0	1074	-
mitogenome	10	96.055	659	20	3	37529	38183	30032010	30032666	0	1068	-
mitogenome	10	93.75	656	25	7	37529	38180	16141687	16142330	0	970	-
mitogenome	10	95.316	427	9	4	31621	32047	36644114	36643699	0	667	trnL-CAA
mitogenome	10	89.002	491	28	10	31038	31523	48262331	48262800	1.04e-162	584	-
mitogenome	10	89.706	408	35	7	25362	25766	7060879	7060476	1.38e-141	514	atp8(partical:84.49%)
mitogenome	10	95.192	312	10	2	31618	31929	36640441	36640747	8.39e-134	488	trnL-CAA
mitogenome	10	94.717	265	11	1	86370	86634	1474088	1473827	6.72e-110	409	-
mitogenome	10	96.552	232	7	1	89446	89677	29945709	29945479	4.07e-102	383	-
mitogenome	10	96.943	229	6	1	89446	89674	29969338	29969565	4.07e-102	383	-
mitogenome	10	96.552	232	7	1	89446	89677	30093531	30093301	4.07e-102	383	-
mitogenome	10	96.943	229	6	1	89446	89674	30122339	30122566	4.07e-102	383	-
mitogenome	10	96	225	9	0	59088	59312	15589727	15589951	4.1e-97	366	cox1(partical:4.67%)
mitogenome	10	74.374	878	170	43	209807	210654	29942026	29942878	2.5e-84	324	rrn18(partical:45.91%)
mitogenome	10	74.374	878	170	43	209807	210654	30126022	30125170	2.5e-84	324	rrn18(partical:45.91%)
mitogenome	10	74.26	878	171	43	209807	210654	30089848	30090700	1.16e-82	318	rrn18(partical:45.91%)
mitogenome	10	74.146	878	172	43	209807	210654	29973021	29972169	5.42e-81	313	rrn18(partical:45.91%)
mitogenome	10	95.977	174	5	2	156173	156345	4962737	4962909	1.53e-71	281	nad4-exon2(partical:33.59%)
mitogenome	10	97.024	168	4	1	23459	23625	11912497	11912330	1.53e-71	281	nad7-intron1(partical:16.78%)
mitogenome	10	98.551	138	2	0	63181	63318	36647077	36646940	2.01e-60	244	trnN-GTT
mitogenome	10	94.203	138	8	0	147353	147490	9465429	9465292	2.03e-50	211	-
mitogenome	10	99.115	113	1	0	94657	94769	21085238	21085126	3.4e-48	204	-
mitogenome	10	98.182	110	1	1	186287	186396	46029417	46029525	2.65e-44	191	-
mitogenome	10	93.6	125	6	1	52659	52783	11720771	11720649	1.23e-42	185	trnM-CAT(partical:43.84%)
mitogenome	10	98.058	103	2	0	141018	141120	15589727	15589829	5.74e-41	180	-
mitogenome	10	98.901	91	1	0	48931	49021	29880931	29881021	5.78e-36	163	-
mitogenome	10	98.901	91	1	0	48931	49021	30034143	30034053	5.78e-36	163	-
mitogenome	10	98.901	91	1	0	48931	49021	30181713	30181803	5.78e-36	163	-
mitogenome	10	98.901	91	1	0	48931	49021	30210592	30210502	5.78e-36	163	-
mitogenome	10	92.793	111	8	0	36516	36626	5956124	5956014	2.08e-35	161	-
mitogenome	10	96.739	92	2	1	48931	49021	16143809	16143718	1.25e-32	152	-
mitogenome	10	86.301	146	12	8	34345	34483	29906998	29906854	1.25e-32	152	trnW-CCA
mitogenome	10	86.713	143	11	8	34345	34480	30008049	30008190	1.25e-32	152	trnW-CCA
mitogenome	10	86.014	143	12	8	34345	34480	16114023	16114164	5.82e-31	147	trnW-CCA
mitogenome	10	94.118	85	5	0	126902	126986	39369013	39369097	5.86e-26	130	-
mitogenome	10	92.391	92	5	2	35236	35327	39373773	39373862	5.86e-26	130	-
mitogenome	10	96.203	79	2	1	114515	114592	29567332	29567410	2.11e-25	128	rps12(partical:11.11%)
mitogenome	10	97.297	74	2	0	71779	71852	29871820	29871747	7.58e-25	126	trnD-GTC
mitogenome	10	97.297	74	2	0	71779	71852	30043250	30043323	7.58e-25	126	trnD-GTC
mitogenome	10	97.297	74	2	0	71779	71852	30172606	30172533	7.58e-25	126	trnD-GTC
mitogenome	10	97.297	74	2	0	71779	71852	30219700	30219773	7.58e-25	126	trnD-GTC
mitogenome	10	93.103	87	5	1	126902	126987	39389447	39389533	7.58e-25	126	-
mitogenome	10	85.593	118	17	0	34012	34129	29907308	29907191	2.73e-24	124	-
mitogenome	10	85.593	118	17	0	34012	34129	30007739	30007856	2.73e-24	124	-
mitogenome	10	85.593	118	17	0	34012	34129	36647596	36647713	2.73e-24	124	-
mitogenome	10	93.827	81	5	0	127642	127722	10984025	10984105	9.8e-24	122	-
mitogenome	10	95.946	74	3	0	95685	95758	15394811	15394738	3.53e-23	121	-
mitogenome	10	97.143	70	2	0	11613	11682	46842406	46842337	1.27e-22	119	-
mitogenome	10	83.621	116	19	0	34012	34127	16113713	16113828	7.63e-20	110	-
mitogenome	10	92.208	77	6	0	52614	52690	29893276	29893200	7.63e-20	110	trnM-CAT
mitogenome	10	92.208	77	6	0	52614	52690	30021789	30021865	7.63e-20	110	trnM-CAT
mitogenome	10	92.208	77	6	0	52614	52690	30194062	30193986	7.63e-20	110	trnM-CAT
mitogenome	10	96.875	64	2	0	144938	145001	6843251	6843314	2.74e-19	108	-
mitogenome	10	90.909	77	7	0	52614	52690	16127499	16127575	3.55e-18	104	trnM-CAT
mitogenome	10	94.203	69	3	1	19513	19580	41204068	41204136	3.55e-18	104	nad7-intron4(partical:3.75%)
mitogenome	10	96.721	61	2	0	108258	108318	2544655	2544595	1.28e-17	102	-
mitogenome	10	98.276	58	1	0	214680	214737	13058068	13058011	1.28e-17	102	-
mitogenome	10	95.161	62	2	1	78977	79038	13015796	13015736	5.94e-16	97.1	-
mitogenome	10	94.828	58	3	0	186985	187042	4286738	4286795	2.76e-14	91.6	rps7(partical:12.98%)
mitogenome	10	85.87	92	5	5	35236	35327	39369099	39369182	2.76e-14	91.6	-
mitogenome	10	98.077	52	1	0	215983	216034	46842401	46842452	2.76e-14	91.6	-
mitogenome	10	93.333	60	4	0	46624	46683	12613218	12613159	9.94e-14	89.8	-
mitogenome	10	100	44	0	0	132017	132060	12613159	12613116	1.66e-11	82.4	-
mitogenome	10	97.872	47	1	0	206022	206068	15032889	15032843	1.66e-11	82.4	-
mitogenome	10	100	43	0	0	53368	53410	10797314	10797356	5.98e-11	80.5	-
mitogenome	10	100	43	0	0	117409	117451	29942158	29942116	5.98e-11	80.5	-
mitogenome	10	100	43	0	0	117409	117451	29972889	29972931	5.98e-11	80.5	-
mitogenome	10	100	43	0	0	117409	117451	30089980	30089938	5.98e-11	80.5	-
mitogenome	10	100	43	0	0	117409	117451	30125890	30125932	5.98e-11	80.5	-
mitogenome	10	97.826	46	1	0	32132	32177	38122788	38122743	5.98e-11	80.5	-
mitogenome	10	89.231	65	3	3	188573	188633	6005666	6005602	2.15e-10	78.7	-
mitogenome	10	97.778	45	1	0	51354	51398	29562625	29562669	2.15e-10	78.7	atp6(partical:5.73%)
mitogenome	10	97.727	44	1	0	60001	60044	10429447	10429404	7.74e-10	76.8	cox1(partical:2.78%)
mitogenome	10	85.526	76	7	3	5501	5573	29927238	29927164	7.74e-10	76.8	ccmC(partical:1.88%),trnI-AAT-intron1,trnI-AAT-exon1,trnI-AAT-exon2
mitogenome	10	85.526	76	7	3	5501	5573	29987810	29987884	7.74e-10	76.8	ccmC(partical:1.88%),trnI-AAT-intron1,trnI-AAT-exon1,trnI-AAT-exon2
mitogenome	10	85.526	76	7	3	5501	5573	30075058	30074984	7.74e-10	76.8	ccmC(partical:1.88%),trnI-AAT-intron1,trnI-AAT-exon1,trnI-AAT-exon2
mitogenome	10	100	40	0	0	152113	152152	28851158	28851197	2.78e-09	75	nad4-intron3(partical:2.07%)
mitogenome	10	97.674	43	1	0	132002	132044	44594137	44594095	2.78e-09	75	-
mitogenome	10	100	39	0	0	169721	169759	8094739	8094701	1e-08	73.1	atp1(partical:2.56%)
mitogenome	10	97.619	42	1	0	17555	17596	29944106	29944147	1e-08	73.1	-
mitogenome	10	97.619	42	1	0	17555	17596	29970941	29970900	1e-08	73.1	-
mitogenome	10	97.619	42	1	0	17555	17596	30091928	30091969	1e-08	73.1	-
mitogenome	10	97.619	42	1	0	17555	17596	30123942	30123901	1e-08	73.1	-
mitogenome	10	100	38	0	0	205509	205546	11453350	11453387	3.6e-08	71.3	-
mitogenome	10	97.619	42	0	1	60919	60959	29566375	29566416	3.6e-08	71.3	-
mitogenome	10	97.561	41	1	0	90276	90316	37884241	37884281	3.6e-08	71.3	-
mitogenome	10	90.566	53	3	2	188784	188836	6295851	6295801	1.3e-07	69.4	-
mitogenome	10	100	37	0	0	213591	213627	10429484	10429448	1.3e-07	69.4	-
mitogenome	10	100	37	0	0	72832	72868	24908142	24908178	1.3e-07	69.4	-
mitogenome	10	97.436	39	1	0	203342	203380	13058011	13058049	4.66e-07	67.6	-
mitogenome	10	95.349	43	0	2	28260	28300	29566375	29566417	4.66e-07	67.6	trnC-GCA(partical:12.68%)
mitogenome	10	97.368	38	1	0	98699	98736	8944731	8944768	1.68e-06	65.8	-
mitogenome	10	97.368	38	1	0	98699	98736	9481496	9481533	1.68e-06	65.8	-
mitogenome	10	97.368	38	1	0	98699	98736	9481756	9481793	1.68e-06	65.8	-
mitogenome	10	100	35	0	0	73953	73987	10429484	10429518	1.68e-06	65.8	rps3-intron1(partical:2.03%)
mitogenome	10	95.238	42	0	2	117642	117681	11391292	11391251	1.68e-06	65.8	-
mitogenome	10	95.238	42	0	1	65591	65632	29560475	29560514	1.68e-06	65.8	nad2-intron2(partical:1.94%)
mitogenome	10	100	35	0	0	28140	28174	29566375	29566409	1.68e-06	65.8	-
mitogenome	10	100	35	0	0	28169	28203	29566375	29566409	1.68e-06	65.8	-
mitogenome	10	97.368	38	1	0	98699	98736	37067988	37067951	1.68e-06	65.8	-
mitogenome	10	97.368	38	1	0	98699	98736	37068354	37068391	1.68e-06	65.8	-
mitogenome	10	97.368	38	1	0	98699	98736	42582248	42582285	1.68e-06	65.8	-
mitogenome	10	100	35	0	0	187380	187414	46029469	46029503	1.68e-06	65.8	-
mitogenome	10	100	34	0	0	73627	73660	7661926	7661959	6.03e-06	63.9	rps3-intron1(partical:1.97%)
mitogenome	10	95	40	2	0	144334	144373	46115578	46115617	6.03e-06	63.9	-
mitogenome	1	100	5263	0	0	212435	217697	2967014	2972276	0	9720	-
mitogenome	1	100	370	0	0	100807	101176	2972273	2972642	0	684	nad1-exon2,nad1-intron1(partical:18.38%)
mitogenome	1	100	307	0	0	111898	112204	2972643	2972949	1.05e-157	568	-
mitogenome	1	98.73	315	3	1	130699	131013	2003484	2003171	6.3e-155	558	-
mitogenome	1	90.578	329	15	5	146855	147182	29113504	29113817	8.63e-114	422	-
mitogenome	1	97.49	239	6	0	184261	184499	26060485	26060723	6.72e-110	409	rrn26(partical:7.53%)
mitogenome	1	92.797	236	17	0	56211	56446	20878781	20879016	6.91e-90	342	nad4L(partical:76.90%)
mitogenome	1	100	166	0	0	62325	62490	9155576	9155411	2.52e-79	307	-
mitogenome	1	94.444	198	9	2	133127	133324	24064652	24064457	3.26e-78	303	-
mitogenome	1	99.371	159	1	0	686	844	2925802	2925960	9.13e-74	289	-
mitogenome	1	99.371	159	1	0	83333	83491	2925802	2925960	9.13e-74	289	cox2-intron1(partical:11.79%)
mitogenome	1	94.972	179	9	0	73035	73213	24063631	24063453	1.53e-71	281	-
mitogenome	1	99.32	147	0	1	203235	203380	2969424	2969278	1.54e-66	265	-
mitogenome	1	92.35	183	12	2	55705	55886	4258861	4258680	7.16e-65	259	atp4(partical:31.43%)
mitogenome	1	96.226	159	5	1	139913	140071	19829875	19829718	7.16e-65	259	-
mitogenome	1	89.286	196	16	2	10966	11161	29950145	29949955	2.59e-59	241	nad2-intron1(partical:20.00%)
mitogenome	1	100	129	0	0	218396	218524	9155407	9155279	9.33e-59	239	-
mitogenome	1	97.826	138	3	0	19820	19957	21558564	21558701	9.33e-59	239	nad7-exon4(partical:56.56%)
mitogenome	1	97.163	141	4	0	112312	112452	24064117	24064257	9.33e-59	239	atp9(partical:58.67%)
mitogenome	1	95.2	125	2	1	209996	210116	26060360	26060484	2.05e-45	195	rrn18(partical:6.55%)
mitogenome	1	98.165	109	2	0	124004	124112	20199764	20199656	2.65e-44	191	-
mitogenome	1	97.273	110	2	1	111650	111759	1477613	1477505	1.23e-42	185	-
mitogenome	1	98.131	107	1	1	115358	115463	1477715	1477609	1.23e-42	185	ccmB(partical:1.77%)
mitogenome	1	91.111	135	12	0	107519	107653	29949618	29949752	4.43e-42	183	ccmFn(partical:4.80%)
mitogenome	1	99	100	1	0	93910	94009	34822964	34822865	5.74e-41	180	ccmFc-exon1(partical:12.82%)
mitogenome	1	95.495	111	5	0	211248	211358	24063990	24063880	2.06e-40	178	rrn18(partical:6.01%)
mitogenome	1	96.97	99	3	0	169466	169564	21567902	21568000	4.47e-37	167	atp1(partical:6.50%)
mitogenome	1	91.129	124	9	1	120106	120229	24064115	24063994	4.47e-37	167	-
mitogenome	1	79.693	261	28	11	206515	206774	7790044	7789808	1.61e-36	165	-
mitogenome	1	98.901	91	1	0	139141	139231	28911311	28911401	5.78e-36	163	-
mitogenome	1	93.458	107	7	0	86600	86706	30637490	30637596	7.47e-35	159	-
mitogenome	1	97.778	90	2	0	143066	143155	26014337	26014248	9.67e-34	156	-
mitogenome	1	98.837	86	1	0	125052	125137	9074923	9074838	3.48e-33	154	-
mitogenome	1	95.833	96	3	1	35602	35696	20199621	20199526	3.48e-33	154	-
mitogenome	1	94.792	96	5	0	198915	199010	29949752	29949847	4.5e-32	150	nad1-intron2(partical:2.78%)
mitogenome	1	98.795	83	1	0	168482	168564	22673039	22673121	1.62e-31	148	atp1(partical:5.45%)
mitogenome	1	88.8	125	8	2	66533	66651	34562658	34562534	1.62e-31	148	nad2-intron2(partical:5.48%)
mitogenome	1	87.786	131	9	4	135696	135822	20524783	20524656	5.82e-31	147	-
mitogenome	1	98.78	82	1	0	144990	145071	21808576	21808657	5.82e-31	147	-
mitogenome	1	88.189	127	10	1	215706	215827	34562410	34562536	5.82e-31	147	-
mitogenome	1	98.75	80	1	0	69031	69110	10323432	10323353	7.52e-30	143	nad2-intron3(partical:4.65%)
mitogenome	1	100	76	0	0	36458	36533	9074842	9074767	2.71e-29	141	-
mitogenome	1	92.079	101	6	1	103306	103406	20524882	20524784	2.71e-29	141	-
mitogenome	1	98.718	78	1	0	29507	29584	26014413	26014336	9.73e-29	139	-
mitogenome	1	100	74	0	0	194377	194450	9074994	9074921	3.5e-28	137	-
mitogenome	1	95.294	85	4	0	75019	75103	20525093	20525177	1.26e-27	135	rps3-intron1(partical:4.94%)
mitogenome	1	97.436	78	2	0	112183	112260	30987450	30987527	4.53e-27	134	atp9(partical:18.67%)
mitogenome	1	96.25	80	3	0	156927	157006	4231100	4231021	1.63e-26	132	nad4-intron1(partical:5.45%)
mitogenome	1	97.333	75	2	0	110830	110904	707423	707349	2.11e-25	128	-
mitogenome	1	98.571	70	1	0	158942	159011	24063758	24063827	2.73e-24	124	-
mitogenome	1	94.937	79	3	1	28726	28803	20199853	20199931	9.8e-24	122	-
mitogenome	1	100	65	0	0	212778	212842	21656523	21656459	3.53e-23	121	-
mitogenome	1	94.805	77	4	0	142847	142923	29271222	29271298	3.53e-23	121	-
mitogenome	1	100	62	0	0	205072	205133	9074706	9074767	1.64e-21	115	-
mitogenome	1	98.462	65	1	0	147151	147215	31850684	31850620	1.64e-21	115	-
mitogenome	1	95.714	70	3	0	89174	89243	4230623	4230692	5.9e-21	113	-
mitogenome	1	98.438	64	1	0	169046	169109	10750529	10750466	5.9e-21	113	atp1(partical:4.20%)
mitogenome	1	97.059	68	0	2	34201	34267	21567907	21567841	5.9e-21	113	-
mitogenome	1	97.015	67	2	0	160281	160347	24064358	24064424	5.9e-21	113	-
mitogenome	1	98.438	64	1	0	77215	77278	28911204	28911267	5.9e-21	113	rpl16(partical:24.90%)
mitogenome	1	96.97	66	2	0	147151	147216	31634047	31634112	2.12e-20	111	-
mitogenome	1	98.387	62	1	0	78229	78290	30606613	30606552	7.63e-20	110	rps14(partical:11.22%)
mitogenome	1	94.366	71	2	1	158095	158163	22672536	22672606	2.74e-19	108	nad4-exon1(partical:14.97%)
mitogenome	1	94.366	71	2	1	158095	158163	22672859	22672929	2.74e-19	108	nad4-exon1(partical:14.97%)
mitogenome	1	100	56	0	0	115538	115593	1477767	1477712	3.55e-18	104	-
mitogenome	1	100	56	0	0	190357	190412	28911399	28911454	3.55e-18	104	-
mitogenome	1	93.151	73	0	1	16921	16993	2970390	2970323	1.28e-17	102	-
mitogenome	1	100	54	0	0	160245	160298	1903362	1903415	4.59e-17	100	-
mitogenome	1	98.182	55	1	0	171409	171463	1301013	1301067	5.94e-16	97.1	-
mitogenome	1	100	52	0	0	96704	96755	7420794	7420743	5.94e-16	97.1	cox3(partical:6.52%)
mitogenome	1	100	52	0	0	34255	34306	21558954	21558903	5.94e-16	97.1	-
mitogenome	1	98.182	55	1	0	193468	193522	22696285	22696231	5.94e-16	97.1	-
mitogenome	1	92.537	67	5	0	75379	75445	30455407	30455341	5.94e-16	97.1	rps3-exon2(partical:4.21%)
mitogenome	1	100	51	0	0	50892	50942	20199853	20199803	2.14e-15	95.3	atp6(partical:6.49%)
mitogenome	1	94.915	59	3	0	211377	211435	7406314	7406372	7.69e-15	93.5	rrn18(partical:0.87%)
mitogenome	1	96.364	55	2	0	32748	32802	9620869	9620815	2.76e-14	91.6	-
mitogenome	1	89.189	74	7	1	62916	62988	27677900	27677827	2.76e-14	91.6	-
mitogenome	1	90.909	66	5	1	62332	62396	30673025	30672960	3.58e-13	87.9	-
mitogenome	1	100	46	0	0	15336	15381	4849498	4849453	1.29e-12	86.1	-
mitogenome	1	97.917	48	1	0	141272	141319	2351671	2351718	4.63e-12	84.2	-
mitogenome	1	84.706	85	11	1	141120	141204	2972856	2972774	4.63e-12	84.2	-
mitogenome	1	97.959	49	0	1	164945	164993	32234552	32234599	4.63e-12	84.2	rpl2-exon1(partical:5.34%)
mitogenome	1	100	44	0	0	73926	73969	9074706	9074663	1.66e-11	82.4	rps3-intron1(partical:2.56%)
mitogenome	1	97.872	47	1	0	930	976	28911264	28911310	1.66e-11	82.4	-
mitogenome	1	97.872	47	1	0	83577	83623	28911264	28911310	1.66e-11	82.4	cox2-intron1(partical:3.48%)
mitogenome	1	87.324	71	7	2	60919	60987	10323355	10323425	5.98e-11	80.5	-
mitogenome	1	92.857	56	1	2	30515	30570	25311804	25311752	2.15e-10	78.7	-
mitogenome	1	90	60	6	0	50347	50406	30637650	30637591	2.15e-10	78.7	-
mitogenome	1	100	42	0	0	208611	208652	30708045	30708004	2.15e-10	78.7	-
mitogenome	1	97.778	45	0	1	209255	209299	2969620	2969663	7.74e-10	76.8	-
mitogenome	1	100	40	0	0	44659	44698	2970382	2970343	2.78e-09	75	-
mitogenome	1	100	40	0	0	95193	95232	20199655	20199616	2.78e-09	75	-
mitogenome	1	100	40	0	0	4074	4113	20199765	20199804	2.78e-09	75	-
mitogenome	1	100	39	0	0	179418	179456	20175111	20175149	1e-08	73.1	-
mitogenome	1	93.75	48	3	0	213482	213529	30158807	30158854	1e-08	73.1	-
mitogenome	1	97.561	41	1	0	40607	40647	5304224	5304184	3.6e-08	71.3	-
mitogenome	1	95.556	45	1	1	79060	79104	10323398	10323355	3.6e-08	71.3	-
mitogenome	1	97.561	41	1	0	120996	121036	10970542	10970582	3.6e-08	71.3	-
mitogenome	1	100	37	0	0	83700	83736	9075031	9074995	1.3e-07	69.4	cox2-intron1(partical:2.74%)
mitogenome	1	100	37	0	0	1053	1089	9075031	9074995	1.3e-07	69.4	-
mitogenome	1	100	37	0	0	159075	159111	24064389	24064425	1.3e-07	69.4	-
mitogenome	1	97.5	40	1	0	201770	201809	30920109	30920070	1.3e-07	69.4	nad5-exon2(partical:3.29%)
mitogenome	1	97.436	39	1	0	65208	65246	10810445	10810483	4.66e-07	67.6	nad2-intron2(partical:1.80%)
mitogenome	1	100	36	0	0	171688	171723	21630779	21630814	4.66e-07	67.6	-
mitogenome	1	97.368	38	1	0	98699	98736	249306	249269	1.68e-06	65.8	-
mitogenome	1	97.368	38	1	0	98699	98736	2706595	2706632	1.68e-06	65.8	-
mitogenome	1	100	35	0	0	138381	138415	5127589	5127555	1.68e-06	65.8	-
mitogenome	1	97.368	38	1	0	98699	98736	8371531	8371494	1.68e-06	65.8	-
mitogenome	1	97.368	38	1	0	98699	98736	8375366	8375329	1.68e-06	65.8	-
mitogenome	1	100	35	0	0	51578	51612	22672441	22672407	1.68e-06	65.8	-
mitogenome	1	97.368	38	1	0	61848	61885	23774888	23774851	1.68e-06	65.8	-
mitogenome	1	97.368	38	1	0	98699	98736	36204231	36204268	1.68e-06	65.8	-
mitogenome	1	97.368	38	1	0	98699	98736	36968997	36968960	1.68e-06	65.8	-
mitogenome	1	97.368	38	1	0	98699	98736	36969295	36969258	1.68e-06	65.8	-
mitogenome	9	99.1	1777	13	3	80168	81943	2571704	2569930	0	3190	cob(partical:66.16%),trnS-GGA
mitogenome	9	100	219	0	0	121837	122055	5427793	5428011	8.69e-109	405	-
mitogenome	9	96.596	235	8	0	15855	16089	39640816	39640582	2.43e-104	390	-
mitogenome	9	99.038	208	2	0	212113	212320	39640373	39640580	2.45e-99	374	-
mitogenome	9	92.735	234	16	1	143727	143960	8796503	8796735	3.22e-88	337	-
mitogenome	9	100	155	0	0	130602	130756	4863817	4863971	3.28e-73	287	-
mitogenome	9	97.619	168	2	1	142145	142312	25666735	25666900	3.28e-73	287	-
mitogenome	9	97.024	168	3	1	142145	142312	14449949	14449784	1.53e-71	281	-
mitogenome	9	98.077	156	1	2	205264	205419	38739849	38740002	3.31e-68	270	-
mitogenome	9	95.455	154	7	0	203062	203215	5652819	5652972	5.58e-61	246	-
mitogenome	9	98.496	133	2	0	32213	32345	45371624	45371756	1.21e-57	235	-
mitogenome	9	99.16	119	1	0	138169	138287	4863970	4864088	1.57e-51	215	-
mitogenome	9	95.489	133	6	0	32213	32345	45369417	45369549	5.65e-51	213	-
mitogenome	9	92.908	141	7	3	161965	162105	36212633	36212496	1.22e-47	202	mttB(partical:39.17%)
mitogenome	9	95	120	6	0	88183	88302	6101979	6101860	9.53e-44	189	-
mitogenome	9	93.651	126	8	0	203026	203151	41701964	41701839	9.53e-44	189	-
mitogenome	9	93.75	128	2	2	31905	32032	41627517	41627396	3.43e-43	187	-
mitogenome	9	97.03	101	3	0	79555	79655	9420462	9420562	3.45e-38	171	-
mitogenome	9	96	100	3	1	92897	92996	8797018	8796920	2.08e-35	161	ccmFc-intron1(partical:10.45%)
mitogenome	9	94.175	103	6	0	141574	141676	36212909	36213011	2.69e-34	158	-
mitogenome	9	93.269	104	7	0	22986	23089	41494048	41494151	3.48e-33	154	nad7-intron1(partical:10.45%)
mitogenome	9	87.786	131	14	2	89518	89648	10738363	10738235	1.25e-32	152	-
mitogenome	9	90.265	113	7	2	134385	134493	36212841	36212729	2.09e-30	145	-
mitogenome	9	97.561	82	2	0	46787	46868	8796289	8796370	2.71e-29	141	-
mitogenome	9	96.429	84	3	0	165120	165203	7770625	7770542	9.73e-29	139	rpl2-exon1(partical:9.16%)
mitogenome	9	100	75	0	0	75471	75545	33777843	33777917	9.73e-29	139	rps3-exon2(partical:4.72%)
mitogenome	9	97.531	81	1	1	213089	213168	8796289	8796209	3.5e-28	137	-
mitogenome	9	97.5	80	2	0	10061	10140	8796450	8796371	3.5e-28	137	nad2-exon2(partical:20.41%)
mitogenome	9	97.468	79	2	0	152839	152917	39508078	39508156	1.26e-27	135	nad4-exon3(partical:18.72%)
mitogenome	9	97.436	78	2	0	98733	98810	33279407	33279484	4.53e-27	134	-
mitogenome	9	97.468	79	1	1	156443	156520	45598177	45598255	4.53e-27	134	nad4-exon2(partical:15.15%)
mitogenome	9	93.258	89	6	0	141347	141435	41702354	41702266	1.63e-26	132	-
mitogenome	9	96.203	79	3	0	202354	202432	6538043	6538121	5.86e-26	130	-
mitogenome	9	94.118	85	4	1	207430	207514	7205848	7205765	2.11e-25	128	-
mitogenome	9	98.571	70	1	0	102189	102258	9420461	9420392	2.73e-24	124	-
mitogenome	9	89.109	101	8	1	60557	60657	36212634	36212731	9.8e-24	122	cox1(partical:6.38%)
mitogenome	9	97.183	71	2	0	167240	167310	41702162	41702232	3.53e-23	121	-
mitogenome	9	100	64	0	0	173183	173246	8795840	8795903	1.27e-22	119	-
mitogenome	9	92.683	82	4	2	174684	174764	11625103	11625183	4.56e-22	117	-
mitogenome	9	98.462	65	1	0	182977	183041	13363077	13363013	1.64e-21	115	rrn26(partical:2.05%)
mitogenome	9	91.667	84	3	1	146510	146593	47832577	47832656	5.9e-21	113	-
mitogenome	9	98.413	63	1	0	97455	97517	3760345	3760283	2.12e-20	111	-
mitogenome	9	96.97	66	2	0	165559	165624	8796209	8796144	2.12e-20	111	-
mitogenome	9	100	60	0	0	114656	114715	34876996	34876937	2.12e-20	111	-
mitogenome	9	96.97	66	2	0	209198	209263	41702163	41702098	2.12e-20	111	-
mitogenome	9	93.333	75	4	1	57749	57822	8796133	8796059	7.63e-20	110	-
mitogenome	9	100	58	0	0	71048	71105	37316085	37316028	2.74e-19	108	-
mitogenome	9	93.151	73	5	0	124619	124691	38199225	38199153	2.74e-19	108	-
mitogenome	9	96.774	62	2	0	19302	19363	6151592	6151653	3.55e-18	104	nad7-intron4(partical:3.42%)
mitogenome	9	98.305	59	1	0	14881	14939	11547022	11546964	3.55e-18	104	-
mitogenome	9	96.721	61	2	0	103995	104055	38199325	38199385	1.28e-17	102	-
mitogenome	9	96.552	58	2	0	123868	123925	6388900	6388843	5.94e-16	97.1	-
mitogenome	9	94.828	58	3	0	56214	56271	9145583	9145526	2.76e-14	91.6	nad4L(partical:19.14%)
mitogenome	9	94.737	57	3	0	160470	160526	35306748	35306804	9.94e-14	89.8	-
mitogenome	9	98.077	52	0	1	76064	76115	41483368	41483418	9.94e-14	89.8	rps3-exon2(partical:3.27%)
mitogenome	9	96.296	54	1	1	106001	106054	9633738	9633686	3.58e-13	87.9	-
mitogenome	9	97.959	49	1	0	216184	216232	41702011	41701963	1.29e-12	86.1	-
mitogenome	9	100	46	0	0	168984	169029	42094572	42094527	1.29e-12	86.1	atp1(partical:3.02%)
mitogenome	9	96.078	51	2	0	156587	156637	9895036	9895086	4.63e-12	84.2	nad4-intron1(partical:3.47%)
mitogenome	9	96	50	2	0	183699	183748	6435674	6435723	1.66e-11	82.4	rrn26(partical:1.57%)
mitogenome	9	92.982	57	3	1	109987	110042	7725708	7725652	1.66e-11	82.4	-
mitogenome	9	96	50	2	0	137016	137065	9112461	9112412	1.66e-11	82.4	-
mitogenome	9	90.323	62	6	0	207779	207840	39045048	39045109	1.66e-11	82.4	-
mitogenome	9	100	43	0	0	87864	87906	8795944	8795902	5.98e-11	80.5	-
mitogenome	9	100	43	0	0	41178	41220	33777769	33777811	5.98e-11	80.5	-
mitogenome	9	97.826	46	1	0	157638	157683	36212497	36212452	5.98e-11	80.5	nad4-intron1(partical:3.13%)
mitogenome	9	97.826	46	1	0	20249	20294	37316130	37316085	5.98e-11	80.5	nad7-intron3(partical:4.37%)
mitogenome	9	100	40	0	0	215423	215462	9633742	9633781	2.78e-09	75	-
mitogenome	9	100	40	0	0	41204	41243	33777805	33777844	2.78e-09	75	-
mitogenome	9	97.674	43	1	0	165338	165380	37369487	37369445	2.78e-09	75	rpl2-exon1(partical:4.69%)
mitogenome	9	100	39	0	0	172123	172161	33540499	33540461	1e-08	73.1	-
mitogenome	9	100	39	0	0	99429	99467	36630450	36630412	1e-08	73.1	-
mitogenome	9	100	38	0	0	162669	162706	11546927	11546964	3.6e-08	71.3	-
mitogenome	9	100	37	0	0	91211	91247	9723353	9723317	1.3e-07	69.4	-
mitogenome	9	100	36	0	0	106765	106800	741230	741265	4.66e-07	67.6	ccmFn(partical:3.14%)
mitogenome	9	97.436	39	1	0	168459	168497	12753220	12753258	4.66e-07	67.6	atp1(partical:2.56%)
mitogenome	9	97.436	39	1	0	40934	40972	37545137	37545175	4.66e-07	67.6	-
mitogenome	9	100	35	0	0	51692	51726	39640407	39640373	1.68e-06	65.8	-
mitogenome	9	95.122	41	1	1	74860	74899	8602655	8602615	6.03e-06	63.9	rps3-intron1(partical:2.32%)
mitogenome	9	100	34	0	0	177470	177503	13056705	13056738	6.03e-06	63.9	-
mitogenome	3	99.655	1159	4	0	62160	63318	8357591	8356433	0	2119	trnN-GTT
mitogenome	3	95.796	666	20	5	37529	38190	6077995	6077334	0	1068	-
mitogenome	3	96.552	232	7	1	89446	89677	8352344	8352114	4.07e-102	383	-
mitogenome	3	100	203	0	0	202148	202350	22321426	22321628	6.82e-100	375	nad5-exon2(partical:9.04%)
mitogenome	3	98.565	209	3	0	29876	30084	26610370	26610578	3.17e-98	370	-
mitogenome	3	74.374	878	170	43	209807	210654	8348661	8349513	2.5e-84	324	rrn18(partical:45.91%)
mitogenome	3	98.343	181	3	0	36855	37035	20428381	20428201	1.16e-82	318	-
mitogenome	3	96.354	192	6	1	207175	207366	16246666	16246476	1.51e-81	315	-
mitogenome	3	74.146	878	172	43	209807	210654	6075840	6074988	5.42e-81	313	rrn18(partical:45.91%)
mitogenome	3	93.909	197	11	1	186401	186596	22479948	22480144	5.46e-76	296	-
mitogenome	3	100	155	0	0	194587	194741	20428559	20428713	3.28e-73	287	-
mitogenome	3	98.462	130	2	0	183398	183527	22321427	22321298	5.61e-56	230	rrn26(partical:4.09%)
mitogenome	3	92.357	157	8	2	51079	51233	21756749	21756595	3.38e-53	220	atp6(partical:19.72%)
mitogenome	3	96.269	134	5	0	40534	40667	22479490	22479623	3.38e-53	220	-
mitogenome	3	90.303	165	10	1	112848	113012	22479623	22479781	2.03e-50	211	-
mitogenome	3	92	150	11	1	164345	164493	6611176	6611325	7.31e-50	209	rpl2-intron1(partical:8.73%)
mitogenome	3	100	112	0	0	199813	199924	11006658	11006547	2.63e-49	207	-
mitogenome	3	100	112	0	0	112594	112705	11006658	11006547	2.63e-49	207	-
mitogenome	3	98.837	86	1	0	105404	105489	3708100	3708185	3.48e-33	154	-
mitogenome	3	97.701	87	2	0	133162	133248	14019975	14019889	4.5e-32	150	-
mitogenome	3	100	81	0	0	97629	97709	20428711	20428791	4.5e-32	150	-
mitogenome	3	95.652	92	4	0	21286	21377	15314272	15314181	1.62e-31	148	nad7-exon3(partical:19.70%)
mitogenome	3	95.604	91	3	1	21297	21387	3893432	3893521	2.09e-30	145	nad7-exon3(partical:19.49%)
mitogenome	3	92.157	102	8	0	182962	183063	22479946	22479845	2.09e-30	145	rrn26(partical:3.21%)
mitogenome	3	98.734	79	1	0	66631	66709	5037466	5037544	2.71e-29	141	nad2-intron2(partical:3.64%)
mitogenome	3	97.561	82	1	1	113724	113805	26160229	26160309	9.73e-29	139	nad3(partical:8.68%)
mitogenome	3	97.368	76	2	0	44520	44595	18980685	18980610	5.86e-26	130	-
mitogenome	3	93.182	88	5	1	167967	168054	20428332	20428246	2.11e-25	128	-
mitogenome	3	98.485	66	1	0	36011	36076	16246412	16246477	4.56e-22	117	-
mitogenome	3	98.485	66	1	0	20768	20833	20428447	20428382	4.56e-22	117	nad7-intron3(partical:6.27%)
mitogenome	3	92.308	78	6	0	16964	17041	26260783	26260860	2.12e-20	111	-
mitogenome	3	94.203	69	4	0	148333	148401	23787514	23787446	9.87e-19	106	-
mitogenome	3	94.118	68	4	0	207779	207846	19524216	19524149	3.55e-18	104	-
mitogenome	3	98.305	59	1	0	168548	168606	21979999	21980057	3.55e-18	104	atp1(partical:3.87%)
mitogenome	3	92.958	71	3	1	142283	142353	15204348	15204280	1.28e-17	102	-
mitogenome	3	100	52	0	0	169476	169527	19228144	19228195	5.94e-16	97.1	atp1(partical:3.41%)
mitogenome	3	100	50	0	0	176674	176723	18091566	18091517	7.69e-15	93.5	-
mitogenome	3	98	50	1	0	150311	150360	25567757	25567806	3.58e-13	87.9	-
mitogenome	3	100	46	0	0	84785	84830	3551099	3551054	1.29e-12	86.1	-
mitogenome	3	100	46	0	0	2138	2183	3551099	3551054	1.29e-12	86.1	-
mitogenome	3	100	46	0	0	77607	77652	12155739	12155784	1.29e-12	86.1	rpl5(partical:8.24%)
mitogenome	3	100	46	0	0	78054	78099	19228317	19228272	1.29e-12	86.1	rps14(partical:15.18%)
mitogenome	3	100	45	0	0	198781	198825	3893437	3893393	4.63e-12	84.2	nad1-intron2(partical:1.31%)
mitogenome	3	100	44	0	0	101607	101650	19228108	19228065	1.66e-11	82.4	nad1-intron1(partical:4.76%)
mitogenome	3	95.918	49	2	0	194949	194997	1684624	1684672	5.98e-11	80.5	-
mitogenome	3	100	43	0	0	117409	117451	6075708	6075750	5.98e-11	80.5	-
mitogenome	3	100	43	0	0	117409	117451	8348793	8348751	5.98e-11	80.5	-
mitogenome	3	100	43	0	0	19584	19626	19228023	19228065	5.98e-11	80.5	nad7-intron4(partical:2.37%)
mitogenome	3	92.857	56	2	1	35093	35146	19228271	19228216	5.98e-11	80.5	-
mitogenome	3	100	40	0	0	216932	216971	1143023	1143062	2.78e-09	75	-
mitogenome	3	100	40	0	0	205255	205294	2571598	2571559	2.78e-09	75	-
mitogenome	3	100	40	0	0	75434	75473	21143885	21143846	2.78e-09	75	rps3-exon2(partical:2.52%)
mitogenome	3	97.619	42	1	0	17555	17596	8350741	8350782	1e-08	73.1	-
mitogenome	3	100	39	0	0	188518	188556	18091563	18091601	1e-08	73.1	-
mitogenome	3	93.75	48	3	0	153156	153203	18488763	18488810	1e-08	73.1	nad4-intron2(partical:1.56%)
mitogenome	3	97.674	43	0	1	213042	213084	22321665	22321624	1e-08	73.1	-
mitogenome	3	100	37	0	0	143859	143895	19961676	19961712	1.3e-07	69.4	-
mitogenome	3	100	36	0	0	124814	124849	16564717	16564752	4.66e-07	67.6	-
mitogenome	3	100	36	0	0	35945	35980	19228194	19228229	4.66e-07	67.6	-
mitogenome	3	97.368	38	1	0	98699	98736	357852	357889	1.68e-06	65.8	-
mitogenome	3	97.368	38	1	0	98699	98736	2218767	2218804	1.68e-06	65.8	-
mitogenome	3	100	35	0	0	36190	36224	12640978	12641012	1.68e-06	65.8	-
mitogenome	3	100	35	0	0	200581	200615	19228109	19228143	1.68e-06	65.8	nad5-intron1(partical:4.17%)
mitogenome	3	93.478	46	0	3	181074	181119	22524598	22524556	1.68e-06	65.8	-
mitogenome	3	97.368	38	1	0	98699	98736	24080448	24080411	1.68e-06	65.8	-
mitogenome	3	97.368	38	1	0	98699	98736	26219340	26219377	1.68e-06	65.8	-
mitogenome	3	97.368	38	0	1	28255	28292	14050978	14051014	6.03e-06	63.9	trnC-GCA(partical:1.41%)
mitogenome	3	97.297	37	1	0	138800	138836	20244825	20244861	6.03e-06	63.9	-
mitogenome	4	97.644	764	16	2	85969	86732	1651951	1652712	0	1310	-
mitogenome	4	96.935	261	8	0	99829	100089	34135126	34134866	8.57e-119	438	-
mitogenome	4	92.771	249	17	1	80184	80431	33084070	33084318	6.86e-95	359	cob(partical:20.98%)
mitogenome	4	94.273	227	11	2	125783	126007	1651725	1651951	5.34e-91	346	-
mitogenome	4	86.392	316	29	8	140596	140903	27709393	27709084	4.16e-87	333	nad6(partical:49.84%)
mitogenome	4	91.453	234	19	1	96320	96553	17978866	17978634	3.24e-83	320	cox3(partical:29.32%)
mitogenome	4	89.623	212	19	2	137243	137452	1320585	1320375	4.28e-67	267	-
mitogenome	4	83.388	307	26	9	155014	155296	22991325	22991630	1.99e-65	261	nad4-intron2(partical:9.22%)
mitogenome	4	100	129	0	0	151637	151765	6765888	6765760	9.33e-59	239	nad4-intron3(partical:6.68%)
mitogenome	4	86.036	222	23	4	170899	171118	22343893	22343678	1.56e-56	231	-
mitogenome	4	99.213	127	1	0	152649	152775	6765889	6766015	5.61e-56	230	nad4-exon3(partical:30.09%)
mitogenome	4	96.377	138	5	0	40752	40889	29771672	29771809	2.02e-55	228	-
mitogenome	4	86.111	216	21	7	203672	203882	3334199	3334410	2.61e-54	224	-
mitogenome	4	96.947	131	3	1	54805	54935	16311625	16311754	1.22e-52	219	-
mitogenome	4	100	116	0	0	17310	17425	14834124	14834239	1.57e-51	215	-
mitogenome	4	100	114	0	0	120957	121070	14833353	14833240	2.03e-50	211	-
mitogenome	4	93.478	138	9	0	25551	25688	30078830	30078693	9.46e-49	206	atp8(partical:28.93%)
mitogenome	4	100	92	0	0	141100	141191	14833900	14833809	3.45e-38	171	-
mitogenome	4	91.667	120	6	1	31710	31829	2152227	2152342	5.78e-36	163	trnL-CAA(partical:50.59%)
mitogenome	4	97.802	91	2	0	173743	173833	1526374	1526464	2.69e-34	158	-
mitogenome	4	94.175	103	6	0	141429	141531	32361124	32361022	2.69e-34	158	-
mitogenome	4	100	84	0	0	129641	129724	6766100	6766017	9.67e-34	156	-
mitogenome	4	100	84	0	0	197582	197665	14833985	14833902	9.67e-34	156	nad1-intron2(partical:2.44%),matR(partical:4.26%)
mitogenome	4	98.851	87	1	0	109158	109244	14834283	14834369	9.67e-34	156	-
mitogenome	4	94	100	6	0	63210	63309	35439775	35439874	1.25e-32	152	trnN-GTT(partical:94.44%)
mitogenome	4	97.674	86	2	0	67237	67322	14833603	14833518	1.62e-31	148	nad2-exon4(partical:15.01%)
mitogenome	4	89.076	119	11	1	96218	96334	3310760	3310642	5.82e-31	147	cox3(partical:8.77%)
mitogenome	4	100	75	0	0	83235	83309	14834731	14834657	9.73e-29	139	cox2-intron1(partical:5.56%)
mitogenome	4	100	75	0	0	588	662	14834731	14834657	9.73e-29	139	-
mitogenome	4	97.531	81	1	1	82797	82877	14834574	14834495	3.5e-28	137	cox2-intron1(partical:6.00%)
mitogenome	4	97.531	81	1	1	150	230	14834574	14834495	3.5e-28	137	-
mitogenome	4	100	73	0	0	51919	51991	18138962	18138890	1.26e-27	135	-
mitogenome	4	100	73	0	0	51919	51991	18145487	18145415	1.26e-27	135	-
mitogenome	4	91	100	5	2	63210	63309	2890277	2890182	1.63e-26	132	trnN-GTT(partical:94.44%)
mitogenome	4	100	71	0	0	171089	171159	26253953	26253883	1.63e-26	132	-
mitogenome	4	97.368	76	2	0	192439	192514	14833354	14833429	5.86e-26	130	-
mitogenome	4	97.368	76	0	2	159670	159743	14833729	14833804	2.11e-25	128	-
mitogenome	4	98.592	71	1	0	142620	142690	21837657	21837587	7.58e-25	126	-
mitogenome	4	100	67	0	0	184017	184083	14832516	14832582	2.73e-24	124	rrn26(partical:2.11%)
mitogenome	4	100	67	0	0	58032	58098	14833496	14833430	2.73e-24	124	nad5-exon3
mitogenome	4	96.053	76	3	0	168488	168563	26994817	26994742	2.73e-24	124	atp1(partical:4.99%)
mitogenome	4	97.222	72	2	0	161824	161895	26995004	26994933	9.8e-24	122	mttB(partical:20.00%)
mitogenome	4	100	64	0	0	104482	104545	14832764	14832701	1.27e-22	119	-
mitogenome	4	98.485	66	1	0	115150	115215	14831900	14831835	4.56e-22	117	ccmB(partical:10.63%)
mitogenome	4	100	63	0	0	215381	215443	14834063	14834125	4.56e-22	117	-
mitogenome	4	95.833	72	3	0	210265	210336	26994817	26994888	4.56e-22	117	rrn18(partical:3.90%)
mitogenome	4	94.595	74	4	0	193422	193495	1196363	1196436	1.64e-21	115	-
mitogenome	4	98.413	63	1	0	196494	196556	14833068	14833130	2.12e-20	111	nad1-intron2(partical:1.83%)
mitogenome	4	98.413	63	1	0	150281	150343	16804005	16803943	2.12e-20	111	-
mitogenome	4	98.333	60	1	0	79879	79938	1909817	1909876	9.87e-19	106	cob(partical:5.08%)
mitogenome	4	100	57	0	0	205038	205094	14833603	14833659	9.87e-19	106	-
mitogenome	4	98.276	58	1	0	145297	145354	1909927	1909870	1.28e-17	102	-
mitogenome	4	100	55	0	0	210138	210192	14834628	14834574	1.28e-17	102	rrn18(partical:2.98%)
mitogenome	4	100	54	0	0	195488	195541	26253831	26253884	4.59e-17	100	-
mitogenome	4	100	53	0	0	113366	113418	14832658	14832606	1.65e-16	99	-
mitogenome	4	100	52	0	0	208272	208323	14833206	14833155	5.94e-16	97.1	-
mitogenome	4	95.082	61	3	0	86987	87047	23666414	23666474	5.94e-16	97.1	-
mitogenome	4	96.61	59	1	1	193473	193531	28332716	28332659	5.94e-16	97.1	-
mitogenome	4	98.148	54	1	0	99682	99735	786388	786335	2.14e-15	95.3	-
mitogenome	4	100	51	0	0	51863	51913	2152341	2152391	2.14e-15	95.3	-
mitogenome	4	100	51	0	0	137840	137890	14832246	14832196	2.14e-15	95.3	-
mitogenome	4	100	50	0	0	89385	89434	14832891	14832842	7.69e-15	93.5	-
mitogenome	4	96.429	56	2	0	40577	40632	16726274	16726329	7.69e-15	93.5	-
mitogenome	4	96.491	57	1	1	48125	48180	16726322	16726378	7.69e-15	93.5	-
mitogenome	4	100	48	0	0	176813	176860	14832400	14832447	9.94e-14	89.8	-
mitogenome	4	96.296	54	2	0	92586	92639	16054833	16054780	9.94e-14	89.8	ccmFc-exon2(partical:9.84%)
mitogenome	4	91.176	68	3	3	148824	148890	25439835	25439770	9.94e-14	89.8	-
mitogenome	4	100	48	0	0	139935	139982	26570530	26570577	9.94e-14	89.8	-
mitogenome	4	98.039	51	1	0	184466	184516	26686876	26686926	9.94e-14	89.8	rrn26(partical:1.61%)
mitogenome	4	94.643	56	3	0	98311	98366	14512043	14512098	3.58e-13	87.9	-
mitogenome	4	98.039	51	0	1	60363	60413	14832792	14832841	3.58e-13	87.9	cox1(partical:3.22%)
mitogenome	4	100	47	0	0	96568	96614	14834368	14834414	3.58e-13	87.9	cox3(partical:5.89%)
mitogenome	4	100	47	0	0	6528	6574	14834963	14835009	3.58e-13	87.9	-
mitogenome	4	94.643	56	3	0	32811	32866	28862284	28862229	3.58e-13	87.9	-
mitogenome	4	97.959	49	1	0	87461	87509	28295895	28295847	1.29e-12	86.1	-
mitogenome	4	94.545	55	3	0	47212	47266	34035442	34035496	1.29e-12	86.1	-
mitogenome	4	100	45	0	0	156320	156364	14832073	14832117	4.63e-12	84.2	nad4-exon2(partical:8.74%)
mitogenome	4	97.917	48	1	0	106345	106392	14833656	14833703	4.63e-12	84.2	-
mitogenome	4	100	45	0	0	66917	66961	14834803	14834847	4.63e-12	84.2	nad2-intron2(partical:2.07%)
mitogenome	4	94.444	54	3	0	109331	109384	18447548	18447601	4.63e-12	84.2	-
mitogenome	4	91.803	61	4	1	143626	143685	20601126	20601066	4.63e-12	84.2	-
mitogenome	4	100	45	0	0	20786	20830	26253954	26253998	4.63e-12	84.2	nad7-intron3(partical:4.28%)
mitogenome	4	90.625	64	5	1	144329	144391	32361181	32361118	4.63e-12	84.2	-
mitogenome	4	100	44	0	0	115684	115727	14832288	14832245	1.66e-11	82.4	-
mitogenome	4	97.917	48	0	1	102499	102545	15744535	15744488	1.66e-11	82.4	-
mitogenome	4	96	50	2	0	16346	16395	26994885	26994934	1.66e-11	82.4	-
mitogenome	4	97.872	47	1	0	34639	34685	35677465	35677511	1.66e-11	82.4	-
mitogenome	4	85	80	10	1	175354	175431	3310681	3310760	5.98e-11	80.5	-
mitogenome	4	100	43	0	0	178321	178363	14833002	14833044	5.98e-11	80.5	-
mitogenome	4	90.164	61	6	0	112051	112111	14833820	14833880	5.98e-11	80.5	-
mitogenome	4	100	43	0	0	134949	134991	14834064	14834022	5.98e-11	80.5	-
mitogenome	4	97.778	45	1	0	80708	80752	14832151	14832195	2.15e-10	78.7	cob(partical:3.81%)
mitogenome	4	100	42	0	0	191441	191482	14832448	14832489	2.15e-10	78.7	-
mitogenome	4	97.826	46	0	1	162546	162590	14832937	14832892	2.15e-10	78.7	-
mitogenome	4	100	42	0	0	112795	112836	14832933	14832974	2.15e-10	78.7	-
mitogenome	4	100	42	0	0	200014	200055	14832933	14832974	2.15e-10	78.7	nad5-exon1(partical:18.34%)
mitogenome	4	97.778	45	1	0	139398	139442	14834283	14834239	2.15e-10	78.7	-
mitogenome	4	100	42	0	0	13528	13569	14834455	14834414	2.15e-10	78.7	-
mitogenome	4	100	42	0	0	170363	170404	16726376	16726417	2.15e-10	78.7	-
mitogenome	4	97.778	45	1	0	187380	187424	30991097	30991141	2.15e-10	78.7	-
mitogenome	4	97.727	44	1	0	151126	151169	14832658	14832701	7.74e-10	76.8	nad4-intron3(partical:2.28%)
mitogenome	4	100	41	0	0	212105	212145	16726417	16726377	7.74e-10	76.8	-
mitogenome	4	100	41	0	0	85609	85649	34056722	34056762	7.74e-10	76.8	-
mitogenome	4	100	40	0	0	129867	129906	786427	786388	2.78e-09	75	-
mitogenome	4	95.652	46	2	0	160358	160403	787632	787677	2.78e-09	75	-
mitogenome	4	97.674	43	1	0	14178	14220	14832007	14831965	2.78e-09	75	-
mitogenome	4	100	40	0	0	190877	190916	14832402	14832363	2.78e-09	75	-
mitogenome	4	100	40	0	0	154877	154916	16726417	16726378	2.78e-09	75	nad4-intron2(partical:1.30%)
mitogenome	4	100	38	0	0	148318	148355	14834023	14833986	3.6e-08	71.3	-
mitogenome	4	97.561	41	1	0	101453	101493	16726417	16726377	3.6e-08	71.3	nad1-intron1(partical:4.43%)
mitogenome	4	100	38	0	0	157720	157757	16804123	16804086	3.6e-08	71.3	nad4-intron1(partical:2.59%)
mitogenome	4	97.561	41	1	0	62370	62410	17575255	17575215	3.6e-08	71.3	-
mitogenome	4	100	37	0	0	119303	119339	14834962	14834926	1.3e-07	69.4	trnY-GTA-2(partical:7.35%)
mitogenome	4	100	37	0	0	185995	186031	14834926	14834962	1.3e-07	69.4	trnY-GTA-3(partical:7.35%)
mitogenome	4	100	37	0	0	51694	51730	16726377	16726413	1.3e-07	69.4	-
mitogenome	4	100	36	0	0	214525	214560	6765723	6765758	4.66e-07	67.6	-
mitogenome	4	100	36	0	0	103724	103759	14831932	14831967	4.66e-07	67.6	-
mitogenome	4	95.349	43	0	2	160371	160413	16726378	16726418	4.66e-07	67.6	-
mitogenome	4	100	36	0	0	163937	163972	16726413	16726378	4.66e-07	67.6	rpl2-intron1(partical:2.11%)
mitogenome	4	95.238	42	2	0	115064	115105	35615355	35615396	4.66e-07	67.6	ccmB(partical:6.76%)
mitogenome	4	93.333	45	2	1	98692	98736	2554445	2554488	1.68e-06	65.8	-
mitogenome	4	93.333	45	2	1	98692	98736	2555310	2555267	1.68e-06	65.8	-
mitogenome	4	93.333	45	2	1	98692	98736	2556037	2556080	1.68e-06	65.8	-
mitogenome	4	97.436	39	0	1	186193	186231	14831898	14831935	1.68e-06	65.8	-
mitogenome	4	100	35	0	0	55670	55704	14832117	14832151	1.68e-06	65.8	atp4(partical:6.04%)
mitogenome	4	97.436	39	0	1	122471	122509	14835100	14835137	1.68e-06	65.8	-
mitogenome	4	95.122	41	2	0	157173	157213	15773888	15773848	1.68e-06	65.8	nad4-intron1(partical:2.79%)
mitogenome	4	95.122	41	2	0	103712	103752	16726419	16726459	1.68e-06	65.8	-
mitogenome	4	100	35	0	0	144447	144481	23881825	23881859	1.68e-06	65.8	-
mitogenome	4	100	34	0	0	197827	197860	14832041	14832008	6.03e-06	63.9	nad1-intron2(partical:0.99%),matR(partical:1.72%)
mitogenome	5	97.059	578	16	1	164483	165060	37335732	37335156	0	972	rpl2-intron1(partical:6.97%),rpl2-exon1(partical:50.05%)
mitogenome	5	90.811	740	39	13	69691	70413	13967618	13966891	0	963	-
mitogenome	5	95.254	590	27	1	139153	139741	11341005	11340416	0	933	-
mitogenome	5	99.78	455	1	0	150818	151272	4823278	4823732	0	835	nad4-intron3(partical:23.58%)
mitogenome	5	99.417	343	2	0	198250	198592	39308712	39308370	2.2e-174	623	nad1-intron2(partical:9.95%),matR(partical:17.38%)
mitogenome	5	93.831	308	12	1	85581	85881	44101579	44101886	2.37e-124	457	-
mitogenome	5	88.855	332	32	3	37625	37951	13650160	13649829	3.13e-108	403	-
mitogenome	5	95.51	245	11	0	150865	151109	14489444	14489200	6.77e-105	392	nad4-intron3(partical:12.69%)
mitogenome	5	94.538	238	7	3	172707	172938	38696750	38696987	5.31e-96	363	-
mitogenome	5	96.552	203	7	0	132644	132846	14706524	14706726	3.22e-88	337	-
mitogenome	5	97.423	194	5	0	44207	44400	13931112	13930919	1.5e-86	331	-
mitogenome	5	97.884	189	4	0	139390	139578	6575836	6575648	1.94e-85	327	-
mitogenome	5	88.936	235	20	2	31859	32093	13931431	13931203	1.18e-72	285	-
mitogenome	5	93.048	187	11	2	156229	156414	36292591	36292776	9.2e-69	272	nad4-exon2(partical:36.12%)
mitogenome	5	94.22	173	10	0	1881	2053	51323331	51323503	1.54e-66	265	-
mitogenome	5	94.22	173	10	0	84528	84700	51323331	51323503	1.54e-66	265	cox2-exon1(partical:24.71%)
mitogenome	5	94.118	170	9	1	209850	210019	15175187	15175019	2.58e-64	257	rrn18(partical:9.20%)
mitogenome	5	97.297	148	4	0	65126	65273	11374644	11374497	1.2e-62	252	nad2-intron2(partical:6.82%)
mitogenome	5	93.836	146	9	0	13358	13503	43351291	43351146	3.38e-53	220	-
mitogenome	5	96.212	132	5	0	20369	20500	40510233	40510364	4.37e-52	217	nad7-intron3(partical:12.55%)
mitogenome	5	94.853	136	7	0	204269	204404	13931431	13931566	5.65e-51	213	-
mitogenome	5	96.154	130	5	0	88047	88176	40231311	40231182	5.65e-51	213	-
mitogenome	5	97.436	117	3	0	170099	170215	38981428	38981544	4.4e-47	200	-
mitogenome	5	93.939	132	4	1	209695	209826	15175308	15175181	5.69e-46	196	rrn18(partical:7.15%)
mitogenome	5	96.19	105	4	0	179849	179953	42056308	42056204	9.6e-39	172	-
mitogenome	5	97.938	97	2	0	11682	11778	11508303	11508399	1.24e-37	169	-
mitogenome	5	93.694	111	7	0	120526	120636	630726	630836	4.47e-37	167	-
mitogenome	5	97.778	90	2	0	32654	32743	35644401	35644490	9.67e-34	156	-
mitogenome	5	97.753	89	1	1	104346	104433	38149735	38149823	1.25e-32	152	-
mitogenome	5	100	82	0	0	219341	219422	42857778	42857697	1.25e-32	152	-
mitogenome	5	98.81	84	1	0	53326	53409	33005575	33005658	4.5e-32	150	-
mitogenome	5	97.674	86	2	0	35647	35732	15167673	15167588	1.62e-31	148	-
mitogenome	5	93.069	101	3	1	31710	31810	14331377	14331473	2.09e-30	145	trnL-CAA(partical:50.59%)
mitogenome	5	92.233	103	5	1	143794	143896	630835	630934	7.52e-30	143	-
mitogenome	5	96.512	86	3	0	112596	112681	38113226	38113311	7.52e-30	143	-
mitogenome	5	96.512	86	3	0	199815	199900	38113226	38113311	7.52e-30	143	-
mitogenome	5	94.505	91	5	0	37057	37147	7218895	7218805	2.71e-29	141	trnS-GCT(partical:77.27%)
mitogenome	5	94.505	91	5	0	37057	37147	7223716	7223626	2.71e-29	141	trnS-GCT(partical:77.27%)
mitogenome	5	98.734	79	1	0	160530	160608	35347715	35347793	2.71e-29	141	-
mitogenome	5	98.684	76	1	0	109691	109766	34620564	34620489	1.26e-27	135	-
mitogenome	5	100	70	0	0	218966	219035	42857629	42857698	5.86e-26	130	-
mitogenome	5	100	68	0	0	52583	52650	40740144	40740211	7.58e-25	126	trnM-CAT(partical:45.21%)
mitogenome	5	93.023	86	5	1	74185	74269	40231105	40231020	2.73e-24	124	rps3-intron1(partical:4.94%)
mitogenome	5	97.183	71	2	0	141932	142002	50796244	50796314	3.53e-23	121	-
mitogenome	5	94.667	75	4	0	104697	104771	12592304	12592378	4.56e-22	117	-
mitogenome	5	97.101	69	2	0	148359	148427	42056138	42056206	4.56e-22	117	-
mitogenome	5	98.462	65	1	0	150210	150274	42056373	42056309	1.64e-21	115	-
mitogenome	5	94.595	74	3	1	13706	13778	5032044	5032117	5.9e-21	113	-
mitogenome	5	100	60	0	0	68572	68631	391437	391378	2.12e-20	111	nad2-intron3(partical:3.48%)
mitogenome	5	95.455	66	2	1	157916	157981	7331500	7331564	3.55e-18	104	nad4-intron1(partical:4.50%)
mitogenome	5	94.118	68	4	0	43701	43768	44923755	44923688	3.55e-18	104	-
mitogenome	5	93.846	65	4	0	11208	11272	7331277	7331213	1.65e-16	99	nad2-intron1(partical:6.63%)
mitogenome	5	88.372	86	4	4	62789	62868	9463528	9463613	1.65e-16	99	-
mitogenome	5	98.182	55	1	0	24124	24178	39126753	39126699	5.94e-16	97.1	-
mitogenome	5	100	51	0	0	40648	40698	13717024	13717074	2.14e-15	95.3	-
mitogenome	5	100	51	0	0	51863	51913	14332197	14332247	2.14e-15	95.3	-
mitogenome	5	95	60	2	1	89066	89124	8333884	8333943	7.69e-15	93.5	-
mitogenome	5	98.113	53	1	0	112403	112455	39126649	39126701	7.69e-15	93.5	atp9(partical:18.22%)
mitogenome	5	94.828	58	3	0	56214	56271	2538084	2538027	2.76e-14	91.6	nad4L(partical:19.14%)
mitogenome	5	87.342	79	10	0	113924	114002	11566322	11566400	2.76e-14	91.6	nad3(partical:22.13%)
mitogenome	5	88.158	76	9	0	119418	119493	15175256	15175181	2.76e-14	91.6	-
mitogenome	5	94.828	58	3	0	56214	56271	36464478	36464535	2.76e-14	91.6	nad4L(partical:19.14%)
mitogenome	5	96.296	54	2	0	94622	94675	37758166	37758219	9.94e-14	89.8	-
mitogenome	5	100	47	0	0	96104	96150	11326227	11326181	3.58e-13	87.9	-
mitogenome	5	100	47	0	0	175499	175545	11326181	11326227	3.58e-13	87.9	-
mitogenome	5	98	50	1	0	120502	120551	33964537	33964586	3.58e-13	87.9	-
mitogenome	5	94.737	57	2	1	40163	40218	38149413	38149469	3.58e-13	87.9	-
mitogenome	5	94.737	57	1	2	166089	166145	38979051	38978997	3.58e-13	87.9	-
mitogenome	5	97.959	49	1	0	142660	142708	10842788	10842740	1.29e-12	86.1	-
mitogenome	5	100	46	0	0	125107	125152	33005532	33005577	1.29e-12	86.1	-
mitogenome	5	100	45	0	0	183151	183195	34620446	34620402	4.63e-12	84.2	rrn26(partical:1.42%)
mitogenome	5	100	45	0	0	188356	188400	36585007	36585051	4.63e-12	84.2	-
mitogenome	5	97.872	47	1	0	31860	31906	15339998	15340044	1.66e-11	82.4	-
mitogenome	5	100	44	0	0	128236	128279	35841614	35841657	1.66e-11	82.4	-
mitogenome	5	97.872	47	1	0	133791	133837	38149624	38149670	1.66e-11	82.4	-
mitogenome	5	97.872	47	1	0	140847	140893	39596790	39596744	1.66e-11	82.4	nad6(partical:7.61%)
mitogenome	5	97.826	46	1	0	142148	142193	40231138	40231183	5.98e-11	80.5	-
mitogenome	5	100	42	0	0	44027	44068	43088758	43088717	2.15e-10	78.7	-
mitogenome	5	97.727	44	1	0	139059	139102	7331602	7331559	7.74e-10	76.8	-
mitogenome	5	100	41	0	0	168796	168836	38149867	38149827	7.74e-10	76.8	atp1(partical:2.69%)
mitogenome	5	97.727	44	1	0	119378	119421	38149994	38149951	7.74e-10	76.8	trnY-GTA-2(partical:36.76%)
mitogenome	5	97.727	44	1	0	185913	185956	38149951	38149994	7.74e-10	76.8	trnY-GTA-3(partical:36.76%)
mitogenome	5	88.71	62	5	2	62205	62266	14571476	14571417	2.78e-09	75	-
mitogenome	5	93.878	49	3	0	185868	185916	15175208	15175256	2.78e-09	75	-
mitogenome	5	100	40	0	0	32136	32175	35352038	35351999	2.78e-09	75	-
mitogenome	5	100	39	0	0	28237	28275	33964624	33964662	1e-08	73.1	-
mitogenome	5	87.302	63	8	0	198156	198218	36292528	36292590	1e-08	73.1	nad1-intron2(partical:1.83%),matR(partical:3.19%)
mitogenome	5	100	39	0	0	87929	87967	40231142	40231104	1e-08	73.1	-
mitogenome	5	97.561	41	1	0	14404	14444	34781205	34781245	3.6e-08	71.3	-
mitogenome	5	95.349	43	2	0	99572	99614	6002021	6001979	1.3e-07	69.4	-
mitogenome	5	97.5	40	1	0	49738	49777	7331047	7331008	1.3e-07	69.4	-
mitogenome	5	95.349	43	2	0	199775	199817	8249214	8249256	1.3e-07	69.4	-
mitogenome	5	100	36	0	0	88819	88854	36702946	36702981	4.66e-07	67.6	-
mitogenome	5	97.436	39	1	0	143069	143107	42056137	42056099	4.66e-07	67.6	-
mitogenome	5	97.436	39	1	0	36898	36936	44708607	44708569	4.66e-07	67.6	-
mitogenome	5	97.368	38	1	0	98699	98736	6617349	6617312	1.68e-06	65.8	-
mitogenome	5	97.368	38	1	0	98699	98736	34726876	34726839	1.68e-06	65.8	-
mitogenome	5	97.368	38	1	0	98699	98736	36813078	36813115	1.68e-06	65.8	-
mitogenome	5	97.368	38	1	0	98699	98736	36813379	36813416	1.68e-06	65.8	-
mitogenome	5	97.368	38	1	0	100379	100416	37335544	37335507	1.68e-06	65.8	-
mitogenome	5	97.368	38	1	0	43509	43546	38149703	38149740	1.68e-06	65.8	-
mitogenome	5	97.368	38	1	0	98699	98736	45791590	45791553	1.68e-06	65.8	-
mitogenome	5	97.368	38	1	0	98699	98736	49638691	49638654	1.68e-06	65.8	-
mitogenome	5	97.368	38	1	0	98699	98736	49638975	49638938	1.68e-06	65.8	-
mitogenome	5	97.368	38	1	0	98699	98736	49639259	49639222	1.68e-06	65.8	-
mitogenome	5	100	34	0	0	209426	209459	3866706	3866673	6.03e-06	63.9	-
mitogenome	5	100	34	0	0	6543	6576	35819726	35819693	6.03e-06	63.9	-
mitogenome	5	97.297	37	1	0	8427	8463	42339286	42339322	6.03e-06	63.9	-
mitogenome	8	98.785	494	6	0	124409	124902	5027315	5026822	0	880	-
mitogenome	8	97.343	414	10	1	194474	194886	13997307	13996894	0	702	-
mitogenome	8	97.222	396	10	1	74275	74669	1992629	1992234	0	669	rps3-intron1(partical:22.94%)
mitogenome	8	100	297	0	0	212895	213191	18933850	18933554	3.79e-152	549	-
mitogenome	8	91.705	217	14	3	60735	60950	2855832	2855619	1.52e-76	298	cox1(partical:5.56%)
mitogenome	8	93.714	175	11	0	182311	182485	1992805	1992631	5.54e-66	263	-
mitogenome	8	98.611	144	2	0	115437	115580	21351459	21351602	9.26e-64	255	-
mitogenome	8	92.683	164	11	1	194304	194467	4448179	4448341	1.21e-57	235	-
mitogenome	8	94.667	150	7	1	211024	211172	2850547	2850398	1.56e-56	231	rrn18(partical:8.07%)
mitogenome	8	98.319	119	2	0	149354	149472	16152940	16152822	7.31e-50	209	-
mitogenome	8	93.333	135	6	1	66383	66514	24617760	24617626	5.69e-46	196	nad2-intron2(partical:6.08%)
mitogenome	8	97.674	86	2	0	186818	186903	2685391	2685306	1.62e-31	148	rps7(partical:15.66%)
mitogenome	8	90.909	110	10	0	134191	134300	14301488	14301379	1.62e-31	148	-
mitogenome	8	100	69	0	0	3058	3126	6398357	6398425	2.11e-25	128	-
mitogenome	8	100	67	0	0	69127	69193	4557233	4557167	2.73e-24	124	nad2-intron3(partical:3.89%)
mitogenome	8	93.902	82	5	0	39777	39858	27922462	27922381	2.73e-24	124	nad5-exon4(partical:19.80%)
mitogenome	8	94.872	78	3	1	88481	88557	16324208	16324131	3.53e-23	121	-
mitogenome	8	85.714	119	10	5	74670	74784	4155164	4155279	1.27e-22	119	rps3-intron1(partical:6.68%)
mitogenome	8	95.714	70	2	1	46809	46877	26411214	26411145	2.12e-20	111	-
mitogenome	8	98.361	61	1	0	117669	117729	5068982	5069042	2.74e-19	108	-
mitogenome	8	100	56	0	0	149418	149473	4391428	4391483	3.55e-18	104	-
mitogenome	8	85.859	99	13	1	130121	130218	15380578	15380676	3.55e-18	104	-
mitogenome	8	98.246	57	1	0	45340	45396	13984539	13984595	4.59e-17	100	-
mitogenome	8	84.848	99	14	1	130121	130218	15381544	15381642	1.65e-16	99	-
mitogenome	8	96.552	58	2	0	104725	104782	4186657	4186600	5.94e-16	97.1	-
mitogenome	8	82.927	123	5	6	128685	128807	4448143	4448037	5.94e-16	97.1	nad1-exon1(partical:31.70%)
mitogenome	8	93.846	65	3	1	76169	76233	17447826	17447763	5.94e-16	97.1	rps3-exon2(partical:4.09%)
mitogenome	8	95	60	3	0	33001	33060	15702963	15703022	2.14e-15	95.3	-
mitogenome	8	98.148	54	0	1	111479	111532	14301557	14301505	7.69e-15	93.5	-
mitogenome	8	92.424	66	4	1	156430	156495	15481294	15481358	7.69e-15	93.5	nad4-exon2(partical:12.82%)
mitogenome	8	96.296	54	2	0	141682	141735	2943667	2943720	9.94e-14	89.8	-
mitogenome	8	98.039	51	1	0	24208	24258	6841897	6841947	9.94e-14	89.8	-
mitogenome	8	93.22	59	4	0	81844	81902	3945691	3945749	3.58e-13	87.9	-
mitogenome	8	100	46	0	0	199115	199160	1992410	1992455	1.29e-12	86.1	nad1-intron2(partical:1.33%)
mitogenome	8	100	45	0	0	175751	175795	14822171	14822127	4.63e-12	84.2	trnM-CAT-2(partical:35.14%)
mitogenome	8	97.872	47	1	0	8062	8108	3102903	3102857	1.66e-11	82.4	-
mitogenome	8	100	43	0	0	207677	207719	1189618	1189576	5.98e-11	80.5	-
mitogenome	8	100	42	0	0	110754	110795	13984539	13984498	2.15e-10	78.7	-
mitogenome	8	91.379	58	3	2	98680	98736	17729442	17729386	2.15e-10	78.7	-
mitogenome	8	95.652	46	2	0	34527	34572	6398501	6398456	2.78e-09	75	-
mitogenome	8	94	50	2	1	190919	190967	15373548	15373499	2.78e-09	75	-
mitogenome	8	94	50	2	1	28307	28356	22677516	22677564	2.78e-09	75	trnC-GCA(partical:70.42%)
mitogenome	8	93.75	48	3	0	214651	214698	15447054	15447007	1e-08	73.1	-
mitogenome	8	97.561	41	1	0	39947	39987	6030553	6030593	3.6e-08	71.3	-
mitogenome	8	95.455	44	2	0	184059	184102	21643888	21643931	3.6e-08	71.3	rrn26(partical:1.39%)
mitogenome	8	100	37	0	0	12228	12264	4186527	4186563	1.3e-07	69.4	rps4(partical:1.47%)
mitogenome	8	95.349	43	2	0	70319	70361	14822215	14822173	1.3e-07	69.4	-
mitogenome	8	97.436	39	1	0	156301	156339	13984497	13984459	4.66e-07	67.6	nad4-exon2(partical:7.57%)
mitogenome	8	100	35	0	0	212023	212057	1189619	1189653	1.68e-06	65.8	-
mitogenome	8	100	35	0	0	88799	88833	1507871	1507905	1.68e-06	65.8	-
mitogenome	8	97.368	38	1	0	98699	98736	17523135	17523172	1.68e-06	65.8	-
mitogenome	8	97.368	38	1	0	98699	98736	17523448	17523485	1.68e-06	65.8	-
mitogenome	8	97.368	38	1	0	98699	98736	17523557	17523594	1.68e-06	65.8	-
mitogenome	8	93.333	45	2	1	98692	98736	17729738	17729695	1.68e-06	65.8	-
mitogenome	8	100	35	0	0	138381	138415	22007057	22007091	1.68e-06	65.8	-
mitogenome	8	100	34	0	0	192827	192860	2822729	2822762	6.03e-06	63.9	-
mitogenome	8	97.368	38	0	1	91858	91895	5271669	5271705	6.03e-06	63.9	-
mitogenome	8	95	40	2	0	49836	49875	23702785	23702746	6.03e-06	63.9	-
mitogenome	2	97.826	368	7	1	127723	128089	34161033	34160666	1.02e-177	634	-
mitogenome	2	97.289	332	9	0	139336	139667	11207659	11207328	1.36e-156	564	-
mitogenome	2	88.235	459	45	7	132351	132807	18568089	18567638	2.28e-149	540	-
mitogenome	2	99.517	207	1	0	3804	4010	11002291	11002497	1.89e-100	377	-
mitogenome	2	93.694	222	14	0	38275	38496	37279094	37278873	4.16e-87	333	nad5-exon5,nad5-intron2(partical:2.33%)
mitogenome	2	91.416	233	7	3	101145	101372	39938922	39939146	2.52e-79	307	nad1-intron1(partical:24.65%)
mitogenome	2	97.516	161	1	1	195846	196006	29882179	29882022	9.2e-69	272	nad1-exon4(partical:22.41%)
mitogenome	2	99.291	141	1	0	140277	140417	39157960	39157820	9.26e-64	255	nad6(partical:13.92%)
mitogenome	2	100	134	0	0	17807	17940	11002498	11002631	1.55e-61	248	nad7-exon5(partical:51.15%)
mitogenome	2	98.529	136	2	0	178418	178553	3896704	3896839	2.59e-59	241	-
mitogenome	2	100	129	0	0	170398	170526	9889775	9889903	9.33e-59	239	-
mitogenome	2	95.105	143	7	0	34405	34547	42840316	42840174	7.26e-55	226	trnW-CCA(partical:27.03%)
mitogenome	2	100	114	0	0	115210	115323	11002846	11002733	2.03e-50	211	ccmB(partical:18.36%)
mitogenome	2	98.077	104	2	0	57754	57857	11002732	11002629	1.59e-41	182	-
mitogenome	2	92.8	125	5	1	187536	187660	19027879	19027759	2.06e-40	178	-
mitogenome	2	91.667	120	6	1	31710	31829	18770631	18770746	5.78e-36	163	trnL-CAA(partical:50.59%)
mitogenome	2	100	85	0	0	39989	40073	11002291	11002207	2.69e-34	158	-
mitogenome	2	97.802	91	1	1	66864	66954	22858578	22858667	9.67e-34	156	nad2-intron2(partical:4.19%)
mitogenome	2	98.824	85	1	0	122922	123006	30600286	30600370	1.25e-32	152	-
mitogenome	2	96.667	90	3	0	105630	105719	11556729	11556818	4.5e-32	150	trnT-GGT-intron1,trnT-GGT-exon1,trnT-GGT-exon2
mitogenome	2	96.667	90	3	0	31649	31738	37072607	37072696	4.5e-32	150	trnL-CAA(partical:83.53%)
mitogenome	2	93.878	98	6	0	31306	31403	27023819	27023722	1.62e-31	148	-
mitogenome	2	82.036	167	27	2	40209	40372	22543708	22543874	9.73e-29	139	-
mitogenome	2	97.436	78	2	0	205464	205541	20850166	20850089	4.53e-27	134	-
mitogenome	2	100	71	0	0	182200	182270	20480683	20480613	1.63e-26	132	-
mitogenome	2	94.048	84	5	0	32073	32156	30600405	30600488	2.11e-25	128	-
mitogenome	2	93.976	83	5	0	177737	177819	30600282	30600200	7.58e-25	126	-
mitogenome	2	94.872	78	4	0	17960	18037	2870855	2870778	9.8e-24	122	nad7-intron4(partical:2.87%),nad7-exon5(partical:9.92%)
mitogenome	2	98.551	69	0	1	18043	18110	32785114	32785046	3.53e-23	121	nad7-intron4(partical:3.75%)
mitogenome	2	98.551	69	0	1	81706	81774	34039576	34039509	3.53e-23	121	-
mitogenome	2	94.667	75	4	0	75016	75090	32001944	32002018	4.56e-22	117	rps3-intron1(partical:4.36%)
mitogenome	2	95.775	71	2	1	104019	104088	40392163	40392093	5.9e-21	113	-
mitogenome	2	96.875	64	2	0	108691	108754	40392090	40392027	2.74e-19	108	-
mitogenome	2	95.455	66	2	1	129069	129134	32001916	32001852	3.55e-18	104	-
mitogenome	2	95.385	65	2	1	97235	97298	20983033	20983097	1.28e-17	102	-
mitogenome	2	86.17	94	12	1	10416	10508	23664289	23664196	4.59e-17	100	nad2-intron1(partical:9.49%)
mitogenome	2	98.246	57	1	0	181695	181751	37443824	37443880	4.59e-17	100	-
mitogenome	2	98.214	56	0	1	97069	97124	29085029	29085083	5.94e-16	97.1	-
mitogenome	2	98.039	51	1	0	51863	51913	18770745	18770795	9.94e-14	89.8	-
mitogenome	2	96.154	52	2	0	36467	36518	42519513	42519564	1.29e-12	86.1	-
mitogenome	2	84.706	85	11	2	91278	91362	34977438	34977520	4.63e-12	84.2	-
mitogenome	2	97.872	47	0	1	8864	8909	43152195	43152149	5.98e-11	80.5	-
mitogenome	2	97.727	44	0	1	196043	196085	29882034	29881991	2.78e-09	75	nad1-exon4(partical:15.52%),nad1-intron2(partical:0.99%)
mitogenome	2	97.619	42	0	1	168944	168984	25053258	25053299	3.6e-08	71.3	atp1(partical:2.69%)
mitogenome	2	100	38	0	0	90418	90455	27116352	27116389	3.6e-08	71.3	-
mitogenome	2	100	38	0	0	63016	63053	34707636	34707673	3.6e-08	71.3	-
mitogenome	2	95.349	43	2	0	172204	172246	9773637	9773679	1.3e-07	69.4	-
mitogenome	2	83.784	74	10	2	98690	98761	24927417	24927344	1.3e-07	69.4	-
mitogenome	2	95.349	43	1	1	7872	7913	19556132	19556090	4.66e-07	67.6	-
mitogenome	2	100	36	0	0	93639	93674	22758651	22758616	4.66e-07	67.6	ccmFc-exon1(partical:4.62%)
mitogenome	2	85.938	64	8	1	98699	98761	24927147	24927084	4.66e-07	67.6	-
mitogenome	2	97.368	38	1	0	98699	98736	13473619	13473582	1.68e-06	65.8	-
mitogenome	2	97.368	38	1	0	98699	98736	13473879	13473842	1.68e-06	65.8	-
mitogenome	2	97.368	38	1	0	98699	98736	15765248	15765285	1.68e-06	65.8	-
mitogenome	2	97.368	38	1	0	98699	98736	15765544	15765581	1.68e-06	65.8	-
mitogenome	2	97.368	38	1	0	98699	98736	16705831	16705794	1.68e-06	65.8	-
mitogenome	2	100	35	0	0	138381	138415	19445993	19445959	1.68e-06	65.8	-
mitogenome	2	97.368	38	1	0	98699	98736	33537005	33536968	1.68e-06	65.8	-
mitogenome	2	97.368	38	1	0	98699	98736	34613689	34613726	1.68e-06	65.8	-
mitogenome	2	97.368	38	1	0	98699	98736	34613978	34614015	1.68e-06	65.8	-
mitogenome	2	95	40	2	0	70734	70773	40784792	40784831	6.03e-06	63.9	-
mitogenome	7	98.854	349	4	0	175870	176218	50653840	50654188	2.2e-174	623	-
mitogenome	7	95.406	283	13	0	13384	13666	8401059	8401341	1.1e-122	451	-
mitogenome	7	89.31	290	29	2	182856	183145	11744540	11744253	5.31e-96	363	rrn26(partical:9.13%)
mitogenome	7	98.537	205	1	2	155753	155956	16460857	16461060	1.91e-95	361	nad4-intron2(partical:6.64%)
mitogenome	7	97.814	183	3	1	176273	176454	3470331	3470513	1.51e-81	315	-
mitogenome	7	89.796	245	22	3	134390	134632	7131911	7132154	1.95e-80	311	-
mitogenome	7	94.413	179	9	1	171266	171443	19968116	19967938	2.56e-69	274	-
mitogenome	7	89.686	223	7	2	10945	11163	18180233	18180443	3.31e-68	270	nad2-intron1(partical:22.35%)
mitogenome	7	94.767	172	9	0	51898	52069	11914969	11914798	1.19e-67	268	-
mitogenome	7	92.268	194	6	2	107077	107270	18226628	18226444	4.28e-67	267	ccmFn(partical:16.93%)
mitogenome	7	96.795	156	4	1	106214	106369	18400144	18399990	7.16e-65	259	-
mitogenome	7	96.154	156	5	1	106214	106369	18226232	18226386	3.33e-63	254	-
mitogenome	7	99.286	140	1	0	74004	74143	18888031	18888170	3.33e-63	254	rps3-intron1(partical:8.13%)
mitogenome	7	90.206	194	14	1	107077	107270	18399744	18399932	1.55e-61	248	ccmFn(partical:16.93%)
mitogenome	7	98.387	124	2	0	17086	17209	62730057	62730180	1.22e-52	219	-
mitogenome	7	91.558	154	12	1	124093	124246	15512510	15512662	2.03e-50	211	-
mitogenome	7	96.063	127	5	0	52938	53064	14446877	14446751	2.63e-49	207	-
mitogenome	7	92.414	145	11	0	197969	198113	58854390	58854246	2.63e-49	207	nad1-intron2(partical:4.21%),matR(partical:7.35%)
mitogenome	7	96.032	126	5	0	128436	128561	18180669	18180544	9.46e-49	206	nad1-exon1(partical:11.08%)
mitogenome	7	96.694	121	4	0	136141	136261	18892197	18892077	1.22e-47	202	trnS-TGA(partical:48.28%)
mitogenome	7	96.667	120	4	0	68524	68643	52051256	52051137	4.4e-47	200	nad2-intron3(partical:6.97%)
mitogenome	7	91.096	146	13	0	107076	107221	14446511	14446366	1.58e-46	198	ccmFn(partical:12.74%)
mitogenome	7	95.935	123	4	1	185229	185350	61147631	61147753	1.58e-46	198	rrn26(partical:3.84%)
mitogenome	7	98.182	110	2	0	139656	139765	13056181	13056072	7.37e-45	193	-
mitogenome	7	95.726	117	2	3	182112	182228	53533870	53533983	1.23e-42	185	-
mitogenome	7	98.99	99	1	0	110842	110940	20522584	20522486	2.06e-40	178	-
mitogenome	7	90.152	132	13	0	10308	10439	18709250	18709119	9.6e-39	172	nad2-intron1(partical:13.47%)
mitogenome	7	98.958	96	1	0	214311	214406	59225132	59225037	9.6e-39	172	-
mitogenome	7	90.698	129	11	1	66068	66195	18557956	18557828	3.45e-38	171	nad2-intron2(partical:5.90%)
mitogenome	7	97.03	101	3	0	33012	33112	60789646	60789746	3.45e-38	171	-
mitogenome	7	93.805	113	5	2	189054	189166	11744650	11744540	1.24e-37	169	-
mitogenome	7	95.283	106	5	0	115280	115385	14446606	14446501	1.24e-37	169	ccmB(partical:14.33%)
mitogenome	7	94.393	107	4	1	186812	186918	55026268	55026372	5.78e-36	163	rps7(partical:19.02%)
mitogenome	7	90.244	123	12	0	83734	83856	64457571	64457449	2.08e-35	161	cox2-intron1(partical:9.12%)
mitogenome	7	90.244	123	12	0	1087	1209	64457571	64457449	2.08e-35	161	-
mitogenome	7	92.105	114	8	1	182629	182741	59035841	59035728	7.47e-35	159	rrn26(partical:3.56%)
mitogenome	7	94	100	6	0	112867	112966	52612467	52612368	1.25e-32	152	-
mitogenome	7	94.059	101	4	1	110793	110891	71179853	71179753	1.25e-32	152	-
mitogenome	7	98.795	83	1	0	169254	169336	63606561	63606643	1.62e-31	148	atp1(partical:5.45%)
mitogenome	7	96.591	88	3	0	209416	209503	59497579	59497666	5.82e-31	147	-
mitogenome	7	93.684	95	6	0	27818	27912	52612373	52612467	7.52e-30	143	-
mitogenome	7	98.734	79	1	0	118361	118439	2858996	2858918	2.71e-29	141	-
mitogenome	7	92.632	95	7	0	209819	209913	11779307	11779401	3.5e-28	137	rrn18(partical:5.14%)
mitogenome	7	98.684	76	1	0	41772	41847	6238179	6238104	1.26e-27	135	nad9(partical:13.26%)
mitogenome	7	94.253	87	5	0	146445	146531	2620235	2620321	4.53e-27	134	-
mitogenome	7	96.053	76	3	0	114476	114551	1082501	1082576	2.73e-24	124	rps12(partical:20.11%)
mitogenome	7	98.571	70	1	0	123381	123450	5790767	5790836	2.73e-24	124	-
mitogenome	7	96.053	76	3	0	99009	99084	18140097	18140022	2.73e-24	124	-
mitogenome	7	98.551	69	1	0	79184	79252	10799145	10799213	9.8e-24	122	-
mitogenome	7	95.946	74	3	0	124251	124324	13056286	13056213	3.53e-23	121	-
mitogenome	7	94.872	78	3	1	119438	119514	18180160	18180237	3.53e-23	121	-
mitogenome	7	94.805	77	3	1	179185	179260	19968943	19969019	1.27e-22	119	-
mitogenome	7	100	63	0	0	137901	137963	14280277	14280339	4.56e-22	117	-
mitogenome	7	95.775	71	1	2	89166	89236	19968113	19968181	5.9e-21	113	-
mitogenome	7	92.308	78	6	0	83185	83262	18709530	18709453	2.12e-20	111	cox2-intron1(partical:5.78%)
mitogenome	7	92.308	78	6	0	538	615	18709530	18709453	2.12e-20	111	-
mitogenome	7	93.333	75	5	0	163751	163825	65081097	65081023	2.12e-20	111	rpl2-intron1(partical:4.39%)
mitogenome	7	96.97	66	1	1	122999	123064	19400138	19400074	7.63e-20	110	-
mitogenome	7	100	59	0	0	91599	91657	44958278	44958336	7.63e-20	110	-
mitogenome	7	96.875	64	2	0	146023	146086	53313401	53313464	2.74e-19	108	-
mitogenome	7	93.151	73	4	1	73404	73475	53691957	53692029	9.87e-19	106	-
mitogenome	7	93.056	72	4	1	141445	141516	18140137	18140207	3.55e-18	104	-
mitogenome	7	100	56	0	0	180882	180937	44958018	44958073	3.55e-18	104	-
mitogenome	7	95.385	65	2	1	115578	115642	55989634	55989697	1.28e-17	102	-
mitogenome	7	100	55	0	0	172710	172764	67683382	67683436	1.28e-17	102	-
mitogenome	7	98.214	56	1	0	72431	72486	66448351	66448406	1.65e-16	99	-
mitogenome	7	96.552	58	2	0	186810	186867	14446234	14446177	5.94e-16	97.1	rps7(partical:7.61%)
mitogenome	7	100	52	0	0	81583	81634	44958278	44958227	5.94e-16	97.1	-
mitogenome	7	100	49	0	0	63628	63676	14055842	14055890	2.76e-14	91.6	-
mitogenome	7	94.828	58	3	0	100435	100492	14446635	14446692	2.76e-14	91.6	-
mitogenome	7	100	49	0	0	98879	98927	44958420	44958372	2.76e-14	91.6	-
mitogenome	7	100	48	0	0	94654	94701	62730181	62730228	9.94e-14	89.8	-
mitogenome	7	100	47	0	0	18765	18811	13371990	13371944	3.58e-13	87.9	nad7-intron4(partical:2.59%)
mitogenome	7	98.039	51	0	1	24890	24939	26388345	26388395	3.58e-13	87.9	-
mitogenome	7	90	70	4	1	110133	110202	56960181	56960115	3.58e-13	87.9	-
mitogenome	7	96.154	52	2	0	218672	218723	13491502	13491451	1.29e-12	86.1	-
mitogenome	7	100	46	0	0	161528	161573	67033960	67033915	1.29e-12	86.1	-
mitogenome	7	100	45	0	0	70994	71038	10799326	10799282	4.63e-12	84.2	-
mitogenome	7	92.982	57	4	0	112444	112500	11914765	11914709	4.63e-12	84.2	-
mitogenome	7	97.917	48	1	0	173839	173886	14055887	14055934	4.63e-12	84.2	-
mitogenome	7	100	44	0	0	1641	1684	10295572	10295615	1.66e-11	82.4	-
mitogenome	7	100	44	0	0	84288	84331	10295572	10295615	1.66e-11	82.4	cox2-exon1(partical:6.29%)
mitogenome	7	100	44	0	0	12440	12483	14446279	14446236	1.66e-11	82.4	rps4(partical:4.04%)
mitogenome	7	100	43	0	0	135898	135940	2620226	2620184	5.98e-11	80.5	-
mitogenome	7	94.231	52	3	0	56146	56197	12445881	12445932	5.98e-11	80.5	-
mitogenome	7	100	43	0	0	55254	55296	13371989	13372031	5.98e-11	80.5	-
mitogenome	7	100	43	0	0	215243	215285	44958184	44958226	5.98e-11	80.5	-
mitogenome	7	100	43	0	0	117409	117451	66407738	66407696	5.98e-11	80.5	-
mitogenome	7	90	60	6	0	78869	78928	7117922	7117863	2.15e-10	78.7	-
mitogenome	7	97.778	45	1	0	203656	203700	14453709	14453753	2.15e-10	78.7	-
mitogenome	7	97.826	46	0	1	21856	21901	19967942	19967898	2.15e-10	78.7	nad7-intron2(partical:4.15%)
mitogenome	7	100	42	0	0	70680	70721	45824536	45824577	2.15e-10	78.7	-
mitogenome	7	95.833	48	2	0	176806	176853	72436817	72436770	2.15e-10	78.7	-
mitogenome	7	95.833	48	2	0	176806	176853	72505862	72505815	2.15e-10	78.7	-
mitogenome	7	97.727	44	1	0	22224	22267	14445899	14445942	7.74e-10	76.8	nad7-intron2(partical:3.97%)
mitogenome	7	89.062	64	4	3	98674	98736	53146625	53146564	7.74e-10	76.8	-
mitogenome	7	100	40	0	0	143169	143208	9216588	9216627	2.78e-09	75	-
mitogenome	7	97.619	42	1	0	132072	132113	16369909	16369868	1e-08	73.1	-
mitogenome	7	100	38	0	0	219132	219169	1082576	1082539	3.6e-08	71.3	-
mitogenome	7	97.561	41	1	0	177157	177197	11914584	11914624	3.6e-08	71.3	-
mitogenome	7	83.333	78	11	2	188675	188752	13436181	13436256	3.6e-08	71.3	-
mitogenome	7	97.561	41	1	0	51726	51766	18709664	18709704	3.6e-08	71.3	-
mitogenome	7	97.561	41	1	0	163901	163941	18709704	18709664	3.6e-08	71.3	rpl2-intron1(partical:2.40%)
mitogenome	7	97.561	41	1	0	29083	29123	18709704	18709664	3.6e-08	71.3	-
mitogenome	7	100	38	0	0	177649	177686	44958146	44958183	3.6e-08	71.3	-
mitogenome	7	100	38	0	0	188853	188890	55026104	55026067	3.6e-08	71.3	-
mitogenome	7	100	38	0	0	196756	196793	57287408	57287445	3.6e-08	71.3	nad1-intron2(partical:1.10%),matR(partical:1.93%)
mitogenome	7	97.561	41	1	0	94845	94885	57287687	57287647	3.6e-08	71.3	-
mitogenome	7	100	38	0	0	192927	192964	63035545	63035582	3.6e-08	71.3	-
mitogenome	7	97.561	41	0	1	23603	23643	14029089	14029050	1.3e-07	69.4	nad7-intron1(partical:4.12%)
mitogenome	7	95.349	43	2	0	78650	78692	18709621	18709663	1.3e-07	69.4	-
mitogenome	7	92	50	2	1	159774	159821	18709716	18709667	1.3e-07	69.4	-
mitogenome	7	100	37	0	0	138381	138417	52337917	52337881	1.3e-07	69.4	-
mitogenome	7	100	37	0	0	120290	120326	64838927	64838963	1.3e-07	69.4	-
mitogenome	7	97.5	40	0	1	67626	67665	15435649	15435611	4.66e-07	67.6	nad2-exon4(partical:6.98%)
mitogenome	7	100	36	0	0	136356	136391	15984100	15984065	4.66e-07	67.6	-
mitogenome	7	95.349	43	1	1	98651	98693	16009671	16009630	4.66e-07	67.6	-
mitogenome	7	97.436	39	1	0	15067	15105	65080984	65081022	4.66e-07	67.6	-
mitogenome	7	93.182	44	3	0	59248	59291	828251	828294	1.68e-06	65.8	cox1(partical:2.78%)
mitogenome	7	100	35	0	0	165552	165586	4923011	4922977	1.68e-06	65.8	-
mitogenome	7	97.368	38	1	0	98699	98736	13439844	13439807	1.68e-06	65.8	-
mitogenome	7	100	35	0	0	136227	136261	44957990	44957956	1.68e-06	65.8	trnS-TGA(partical:40.23%)
mitogenome	7	100	35	0	0	4119	4153	44958372	44958338	1.68e-06	65.8	-
mitogenome	7	97.436	39	0	1	185372	185409	57287283	57287321	1.68e-06	65.8	rrn26(partical:1.20%)
mitogenome	7	97.368	38	1	0	98699	98736	62013459	62013496	1.68e-06	65.8	-
mitogenome	7	93.333	45	0	3	188965	189007	1978539	1978582	6.03e-06	63.9	-
mitogenome	7	100	34	0	0	50630	50663	11914764	11914797	6.03e-06	63.9	-
mitogenome	7	100	34	0	0	92456	92489	15808298	15808331	6.03e-06	63.9	ccmFc-exon2(partical:6.19%)
mitogenome	7	100	34	0	0	157319	157352	54725513	54725546	6.03e-06	63.9	nad4-intron1(partical:2.32%)
